# Supplementary material for: Evaluating Climate Emulation: Unit Testing of Simple Climate Models
Source: Copernicus journal article supplement (doi:10.5194/esd-2018-63), 2018-09-27
Supplement: Supplementary file 1 [file Schwarber et al. ESD Supplement.pdf › Supplement and Datasets/Schwarber et al. ESD Supplement.pdf]

# Supplement: Evaluating Climate Emulation: Unit Testing of Simple Climate Models

Adria K. Schwarber<sup>1</sup>, Steven J. Smith<sup>1,2</sup>, Corinne A. Hartin<sup>2</sup>, Benjamin Aaron Vega-Westhoff<sup>3</sup>,  
Ryan Sriver<sup>3</sup>

<sup>1</sup>Department of Atmospheric and Oceanic Science, University of Maryland, College Park, MD 20742

<sup>2</sup>Joint Global Change Research Institute, 5825 University Research Ct, College Park, MD 20740

<sup>3</sup>Department of Atmospheric Sciences, University of Illinois Urbana-Champaign, Champaign, IL 61820

*Correspondence to:* Adria K. Schwarber (adria.schwarber@gmail.com)

## Contents

|                                                                                                    |           |
|----------------------------------------------------------------------------------------------------|-----------|
| <b>S1 Supplementary Method</b>                                                                     | <b>2</b>  |
| <b>S2 Model Design</b>                                                                             | <b>5</b>  |
| <b>S2.1 Model Settings</b>                                                                         | <b>7</b>  |
| <b>S2.2 AR5-IR</b>                                                                                 | <b>7</b>  |
| <b>S2.3 FAIR</b>                                                                                   | <b>8</b>  |
| <b>S2.4 MAGICC 5.3 BC-OC</b>                                                                       | <b>8</b>  |
| <b>S2.5 MAGICC 6.0</b>                                                                             | <b>9</b>  |
| <b>S2.6 Hector v2.0 Settings</b>                                                                   | <b>9</b>  |
| <b>S3 CMIP5 Model Data</b>                                                                         | <b>9</b>  |
| <b>S4 Sensitivity Experiments in MAGICC 5.3</b>                                                    | <b>12</b> |
| <b>S4.1 Impact of Changes to the Years of Emission Impulses</b>                                    | <b>12</b> |
| <b>S4.2 Impact of Emissions Pulses Size on Temperature Response</b>                                | <b>14</b> |
| <b>S5 Adjusted Total Forcing Response</b>                                                          | <b>16</b> |
| <b>S6 Total Forcing Response from BC Emissions Impulse</b>                                         | <b>20</b> |
| <b>S7 CO<sub>2</sub> Concentration Responses from Emissions Impulses</b>                           | <b>22</b> |
| <b>S8 Model Responses out to 2300</b>                                                              | <b>26</b> |
| <b>S8.1 CO<sub>2</sub> Concentration Response to a CO<sub>2</sub> Emissions Pulse</b>              | <b>26</b> |
| <b>S8.2 CH<sub>4</sub> Concentration Response from CH<sub>4</sub> Emissions Pulse</b>              | <b>28</b> |
| <b>S8.3 CO<sub>2</sub> Concentration Response to a BC or CH<sub>4</sub> Emissions Pulse</b>        | <b>30</b> |
| <b>S8.4 Total Forcing Response to a CO<sub>2</sub> or CH<sub>4</sub> Emissions Pulse</b>           | <b>32</b> |
| <b>S8.5 Global Mean Temperature Response to a CH<sub>4</sub> or CO<sub>2</sub> Emissions Pulse</b> | <b>34</b> |
| <b>S9 Time Integrated Responses</b>                                                                | <b>36</b> |

|    |                                                                                                         |           |
|----|---------------------------------------------------------------------------------------------------------|-----------|
|    | <b>S9.1 Time Integrated Responses from a CO<sub>2</sub> Concentration Impulse .....</b>                 | <b>36</b> |
| 35 | <b>S9.2 Time Integrated Responses from a CO<sub>2</sub> Emissions Impulse.....</b>                      | <b>41</b> |
|    | <b>S9.3 Time Integrated Responses from a CH<sub>4</sub> Emissions Impulse.....</b>                      | <b>46</b> |
|    | <b>S9.4 Time Integrated Responses from a BC Emissions Impulse .....</b>                                 | <b>51</b> |
|    | <b>S10 Temporal Response of SCMs Compared to CMIP5.....</b>                                             | <b>56</b> |
|    | <b>S10.1 Changing Equilibrium Climate Sensitivity Values in SCMs with Comparison to CMIP5.</b>          | <b>61</b> |
| 40 | <b>S11 Comparison to Previous Impulse Responses Work by Joos <i>et al.</i> (Joos et al. 2013) .....</b> | <b>63</b> |
|    | <b>S12 Investigating Temperature Response from BC Step Experiment .....</b>                             | <b>71</b> |
|    | <b>S13 Summary of SCM Performance in Table 1 .....</b>                                                  | <b>73</b> |
|    | <b>S14 Supplementary Data .....</b>                                                                     | <b>74</b> |
|    | <b>S15 References.....</b>                                                                              | <b>82</b> |

45

## S1 Supplementary Method

We note that unit testing in software refer to a specific method of comparing output from the smallest portion of code, called a unit (i.e., function), to known outputs (Clune and Rood 2011).

50 Here, we use this term in a similar way as van Vuuren *et al.* (van Vuuren et al. 2011), where MAGICC 6.0 was used as the reference output to compare several human-Earth system models. We conduct our unit test with comparable inputs and compare model-generated outputs from several SCMs.

55 We conduct perturbations of three contrasting chemical species: carbon dioxide (CO<sub>2</sub>), methane (CH<sub>4</sub>), and black carbon (BC). We begin with CO<sub>2</sub> because this well-mixed greenhouse gas is the largest contributor to anthropogenic forcing changes (Myhre et al. 2013). Methane is also of interest because it is a shorter-lived greenhouse gas, with chemical interactions with itself and other species (Cicerone, R.J.; Oremland 1988). Finally, we use BC perturbations to represent  
60 aerosols more generally because we are interested in model responses to a short-lived climate forcers (Bond et al. 2013; Harmsen et al. 2015). SCM representations of other aerosols species are similar so we do not conduct impulse tests of other species.

The SCMs we use are readily comparable because they read in similar emissions files.

65 Background trajectory emissions are taken from the published Representative Concentration

Pathway (RCP) 4.5 scenario (Thomson et al. 2011) database, which means that all calculations in the main paper are conducted relative to a changing CO<sub>2</sub> concentration background, unless otherwise noted. SCMs are often used to project global mean temperature over various future scenarios, so this is the most relevant type of background on which to test these models.

70 Conducting these experiment with a constant CO<sub>2</sub> background, as previously used in the literature (Joos et al. 2013), requires inverse modeling of the individual models to produce constant CO<sub>2</sub> concentration emissions files. Our methodology is easier to implement as a regular unit test. To this end, we provide comparable input emission files used in this paper.

75 In many SCMs, forcing over historical periods is explicitly calibrated to a model base year, so it is not possible to conduct perturbations during these time periods. Therefore, our perturbations are conducted in 2015 to avoid the model base years of our SCMs. In the main paper, we show some model responses out to 2300, the end of the MAGICC model runs, equal to 285 years after the perturbation. Additional results are in the Supplement (SI8).

80

We run reference scenarios in the SCMs, followed by each perturbation case described below. For each experiment (see below) we report the response, which is obtained by subtracting the reference from the perturbation results. For instance, the CO<sub>2</sub> concentration response is obtained as follows:

85

$$CO_2Concentration_{response}(t) = CO_2Concentration_{perturbation}(t) - CO_2Concentration_{reference}(t) \quad (1)$$

We conducted the following impulse tests:

90 *a. Concentration impulse (CO<sub>2</sub>).*

These SCMs can be used in a mode where CO<sub>2</sub> concentrations are exogenously specified. We carry out this experiment by instantaneously increasing CO<sub>2</sub> concentration by 200 ppm in 2015. After 2015, CO<sub>2</sub> concentrations return to the baseline levels following the published RCP4.5 scenario. Note, we do not conduct separate forcing impulse experiments because this is functionally equivalent to a concentration impulse. In this experiment, we are only interested in the dynamics of the models' temperature response. This experiment eliminates the added

95

uncertainty in the emissions to concentrations calculation and complicating factors from carbon cycle feedbacks.

100 *b. Emissions impulse (BC, CH<sub>4</sub>, CO<sub>2</sub>).*

For this experiment all models were run with an emissions input. We carry out this experiment by increasing individual emissions (BC, CH<sub>4</sub>, or CO<sub>2</sub>) in one year. Following that year, the emissions return to the RCP4.5 pathway for all subsequent years. In this experiment CO<sub>2</sub> concentrations are allowed to vary as determined by each model. We find our perturbation values  
105 by doubling the 2015 value for each chemical species equal to a 9.2 PgC pulse of CO<sub>2</sub>, a 329 Tg pulse of CH<sub>4</sub>, and a 7981 Gg pulse of BC. We also perturb CO<sub>2</sub> emissions in 2010, 2020, 2030, 2040, 2050 to understand changes in model responses over time and see very small difference in the model response (SI5). We compare results from three comprehensive SCMs to two IR models, AR5-IR and FAIR model (Millar et al. 2017; Myhre et al. 2013) (SI2).

110

We also compared results to several ESMs and EMICs by carrying out a 100 GtC CO<sub>2</sub> impulse, following Joos *et al.* (Joos et al. 2013) (SI11). This is approximately 10x the CO<sub>2</sub> perturbation pulse described above.

115 Finally, we conduct a 4xBC emissions step experiment. We compare the SCM temperature responses with the response of a complex climate model used by Sand *et al.* (Sand et al. 2016) (SI12).

*c. Step increase in CO<sub>2</sub> concentration (instantaneous 4×CO<sub>2</sub> concentration experiment).*

120 Similar to comparison (a), in this experiment, CO<sub>2</sub> concentrations are prescribed. We have CO<sub>2</sub> concentrations follow a pre-industrial pathway (278.0516 ppmv in 1765) until 2014. The CO<sub>2</sub> concentration is quadrupled (4x) in 2015, and maintained at this level until 2300. This follows experimental protocol used in the CMIP5 experimental design (Taylor, Stouffer, and Meehl 2012).

125

We compare these results to drift-corrected (Gupta et al. 2013) global mean temperature results from 15 complex climate models from the CMIP5 archive. We drift-correct the CMIP5 global

mean temperature time series by subtracting the slope of the linear fit from the full time series for each individual model.

130

We ran Hector v2.0 with few changes to the default configuration file settings. We changed two model time steps in Hector v2.0: (1) the carbon-cycle-solver.cpp time step from dt(0.3) to dt(0.1) and (2) the ocean\_component.hpp OCEAN\_MIN\_TIMESTEP from 0.3 to 0.01 to allow for the carbon cycle, in particular the ocean carbon cycle to accurately integrate across the sharp  
135 gradient introduced by these experiments. In experiments where we constrained the CO<sub>2</sub> concentration, these changes significantly increase the model run time for this scenario.

140

Additionally, we used an equilibrium climate sensitivity (ECS) value of 3°C in the SCMs, with the exception of the idealized SCMs, FAIR and AR5-IR, where these parameters cannot be set by the user (see Table S9).

## **S2 Model Design**

145

We conduct unit tests within three comprehensive SCMs and two stylized SCMs. The three comprehensive SCMs have structural differences worth noting. Hector v2.0, has explicit ocean carbon chemistry in four boxes, where ocean carbon uptake is a non-linear function of the solubility of carbon. MAGICC 5.3 BC-OC and 6.0 have differential hemispheric forcing over land and ocean, thereby calculating temperature over each box. Important characteristics of the carbon and climate components of each model are shown in Table S1.

150

**Table S1** Main carbon cycle and climate characteristics of SCMs and IRFs

| <b>Model</b>                                                                                | <b>Model description</b>               | <b>Carbon cycle</b>                                                                                     | <b>Climate component</b>                                             |
|---------------------------------------------------------------------------------------------|----------------------------------------|---------------------------------------------------------------------------------------------------------|----------------------------------------------------------------------|
| Hector v2.0 (C. A. Hartin et al. 2015; Corinne A Hartin et al. 2016; Kriegler 2005a)        | mechanistic climate carbon-cycle model | One-pool atmosphere, three-pool land, and four-pool ocean                                               | Global Energy balance model, with ocean heat diffusion               |
| MAGICC 5.3 BC-OC (Raper and Cubasch 1996; S. J. Smith and Bond 2014; Wigley and Raper 1992) | mechanistic climate carbon-cycle model | One-pool atmosphere, three-pool land, and one-pool ocean                                                | 4-box Energy balance model, with ocean heat upwelling diffusion      |
| MAGICC 6.0 (Meinshausen, Raper, and Wigley 2011)                                            | mechanistic climate carbon cycle model | One-pool atmosphere, three-pool land, and one-pool ocean                                                | 4-box Energy balance model, with ocean heat upwelling diffusion      |
| AR5-IR (Myhre et al. 2013)                                                                  | Impulse-response function              | Impulse-response function                                                                               | Equilibrium temperature as a function of RF                          |
| FAIR v1.0 (Millar et al. 2017)                                                              | Impulse-response function              | Four timescale impulse-response function with state-dependence of the CO <sub>2</sub> airborne fraction | Equilibrium temperature as a function of RF; IRF with two timescales |

160 Some SCMs also include representations of aerosol dynamics, though the model representations differ. As mentioned in the main paper, unlike Hector v2.0, both version of MAGICC have differential hemispheric forcing over land and ocean. AR5-IR represents BC forcing response as a simple exponential, similar to the response from greenhouse gas forcing. FAIR v1.0, used here, represents the relationship between CO<sub>2</sub>-only emissions, concentrations, and temperature. Other  
165 versions of FAIR include non-CO<sub>2</sub> forcing, such as BC.

## S2.1 Model Settings

Here we discuss the model settings used in our experiments, noting any changes made to the  
170 default settings. The three comprehensive SCMs were run with the same ocean diffusivity value and ECS value, unless otherwise noted.

## S2.2 AR5-IR

175 The IPCC AR5 (Myhre et al. 2013) describes a multi-gas impulse function using a multi-gas equivalence metric, Absolute Global Temperature Potential (AGTP), to compare temperature changes at a chosen time in response to a unit pulse of emissions  $i$ . AGTP is found via a convolution of the fraction of the species  $i$  remaining in the atmosphere after an emissions pulse and the climate response to a unit forcing  $R_T(t) = \sum_{j=1}^M \frac{c_j}{d_j} \exp(-\frac{t}{d_j})$  (1).

180

$$AGTP_i(H) = \int_0^H RF_i(t) R_T(H-t) dt \quad (2)$$

$$\text{and } RF_i(t) = A_i R_i(t), \quad (3)$$

$$\text{where for most species } R_i(t) = \exp(-\frac{t}{\tau_i}), \quad (4)$$

$$185 \text{ and for CO}_2 R_{CO_2}(t) = a_0 + \sum_{i=1}^N a_i \exp(-\frac{t}{\tau_i}), \quad (5)$$

and  $A_i$  is the radiative efficiency yielding, the general equation:

$$AGTP_i(H) = A_i \sum_{j=1}^2 \frac{\tau_j c_j}{\tau - d_j} \left( \exp\left(\frac{-H}{\tau}\right) - \exp\left(\frac{-H}{d_j}\right) \right) \quad (6)$$

AGTP can then be used to calculate global mean temperature change from any given emission  
190 scenario using,

$$\Delta T = \sum \int_0^t E_i(s) AGTP_i(t - s) ds \quad (7)$$

where  $E_i$  are the emissions of a species,  $t$  is the time horizon, and  $s$  is the time of  
195 emissions(Myhre et al. 2013). For this paper, AR5-IR was recoded in R and is available for  
download with the Supplementaty Materials.

### S2.3 FAIR

200 The FAIR v1.0 model is a modified version of the AR5-IR carbon cycle component, updated to  
include the state-dependence of the CO<sub>2</sub> airborne fraction to reproduce the relationship between  
CO<sub>2</sub>-only emissions, concentrations, and temperature over the historical period. Millar *et*  
*al.*(Millar et al. 2017) began with the impulse response functions used for calculation of multi-  
gas equivalence metrics in IPCC-AR5(Myhre et al. 2013) and extended the CO<sub>2</sub> IRF by coupling  
205 the carbon-cycle to the thermal response and to cumulative carbon uptake by terrestrial and  
marine sinks. FAIR is available for download at <https://github.com/OMS-NetZero/FAIR>.

Here, we use the first iteration of FAIR, but we note that two new versions have recently been  
published, FAIR v1.1 and FAIR v1.3. FAIR v1.3 extends the original version to, “calculate non-  
210 CO<sub>2</sub> greenhouse gas concentrations from emissions, aerosol forcing from aerosol precursor  
emissions, tropospheric and stratospheric ozone forcing from the emissions of precursors, and  
forcings from black carbon on snow, stratospheric methane oxidation to water vapour, contrails  
and land use change (C. J. Smith et al. n.d.).”

### 215 S2.4 MAGICC 5.3 BC-OC

MAGICC 5.3 BC-OC is a version of MAGICC 5.3 developed in conjunction with the Global  
Change Assessment Model (GCAM). MAGICC 5.3 used here is available in GCAM version 4.4,  
available for download at <https://github.com/JGCRI/gcam-core/releases>. The major change in



220 this version of MAGICC was the addition of explicit BC and OC(S. J. Smith and Bond 2014). To enable MAGICC 5.3 within GCAM, the climate model must be set to <Value name = "climate">../input/climate/magicc.xml</Value> within the configuration file. We ran this model with all its default configuration settings, unless otherwise noted in the text.

## 225 **S2.5 MAGICC 6.0**

MAGICC 6.0 was run with all the default settings. For the main experiments, the climate sensitivity was set to 3.0°C to match the default setting of MAGICC 5.3 BC-OC and Hector v2.0, unless otherwise noted. The MAGICC 6.0 executable is available for free download here:

230 <http://www.magicc.org/>.

## **S2.6 Hector v2.0 Settings**

We use a new version of Hector (v2.0), an open-source, object-oriented, simple global climate carbon-cycle model (C. A. Hartin et al. 2015). The model can found at:  
235 <http://github.com/JGCRI/hector>. In the version used here (Hector v2.0), Hector v1.0 is coupled to a 1-D diffusive heat and energy balance model (DOECLIM: Diffusion Ocean Energy balance CLIMate model). DOECLIM is well documented and has been widely used in climate uncertainty studies (Bakker et al. 2017; Kriegler 2005b; Urban et al. 2014). DOECLIM includes  
240 three tunable parameters: climate sensitivity, ocean vertical heat diffusivity, and a scaling factor for aerosol forcing (Garner, Reed, and Keller 2016). Using default values for these parameters, we find that the new coupled model (Hector v2.0) exhibits improved vertical ocean structure and heat uptake, as well as surface temperature response to radiative forcing, compared to earlier versions of Hector.

## 245 **S3 CMIP5 Model Data**

The CMIP5 model data used to produce Figure 4, Figure S12, and Figure S22 is described here. Climate model output from 15 models was obtained from the CMIP5 data archive ([http://cmip-pcmdi.llnl.gov/cmip5/data\\_portal.html](http://cmip-pcmdi.llnl.gov/cmip5/data_portal.html)) and the World Data Center for Climate site ([9](http://cera-</a></p></div><div data-bbox=)

[www.dkrz.de/WDCC/ui/Index.jsp](http://www.dkrz.de/WDCC/ui/Index.jsp)). The long-term drift is removed from the CMIP5 model data by subtracting the linear trend from the corresponding pre-industrial control run (Gupta et al. 2013). Table S2 provides the CMIP5 modeling centre name and the model name from Figure 4.

**Table S2** CMIP5 and SCM model information

| Centre(s)                                                                                                                                                                                               | Model name   |
|---------------------------------------------------------------------------------------------------------------------------------------------------------------------------------------------------------|--------------|
| Beijing Climate Center (BCC)<br><b>China</b>                                                                                                                                                            | BCC-CSM1.1   |
| Canadian Centre for Climate Modelling and Analysis (CCCma)<br><b>Canada</b>                                                                                                                             | CanESM2      |
| Centre National de Recherches Météorologiques,<br>Centre Européen de Recherche et de Formation Avancée en Calcul<br>Scientifique (CNRM-CERFACS)<br><b>France</b>                                        | CNRM-CM5-2   |
| Institut Pierre Simon Laplace (IPSL)<br><b>France</b>                                                                                                                                                   | IPSL-CM5A-LR |
|                                                                                                                                                                                                         | IPSL-CM5A-MR |
|                                                                                                                                                                                                         | IPSL-CM5B-LR |
| Institute of Atmospheric Physics, Chinese Academy of Sciences (LASG-<br>CESS)<br><b>China</b>                                                                                                           | FGOALS-g2    |
| Atmosphere and Ocean Research Institute (The University of Tokyo),<br>National Institute for Environmental Studies, and<br>Japan Agency for Marine-Earth Science and Technology (MIROC)<br><b>Japan</b> | MIROC-ESM    |
|                                                                                                                                                                                                         | MIROC5       |
| Max Planck Institute for Meteorology (MPI-M)<br><b>Germany</b>                                                                                                                                          | MPI-ESM-MR   |
|                                                                                                                                                                                                         | MPI-ESM-P    |
| NASA/GISS (Goddard Institute for Space Studies; NASA-GISS)<br><b>USA</b>                                                                                                                                | GISS-E2-H    |
|                                                                                                                                                                                                         | GISS-E2-R    |
| Geophysical Fluid Dynamics Laboratory (NCAR; NSF-DOE-NCAR)<br><b>USA</b>                                                                                                                                | GFDL-CM3     |
|                                                                                                                                                                                                         | GFDL-ESM2G   |

## S4 Sensitivity Experiments in MAGICC 5.3

265 We conduct two sensitivity experiments to illustrate there is little impact of these choices on the model responses: (1) perturb CO<sub>2</sub> emissions in different years and (2) perturb CO<sub>2</sub> emissions at different levels in 2015.

### S4.1 Impact of Changes to the Years of Emission Impulses

270 We test CO<sub>2</sub> emissions perturbations in different years from the default 2015 used in the main text. **Error! Not a valid bookmark self-reference.** shows the global mean temperature response normalized by the 2010 global mean temperature response from a CO<sub>2</sub> emissions pulse in MAGICC 5.3. We found a maximum of 0.028°C/PgC difference in the response in MAGICC 5.3 and, therefore, carried out the remainder of the experiment in 2015, avoiding model base years.

275

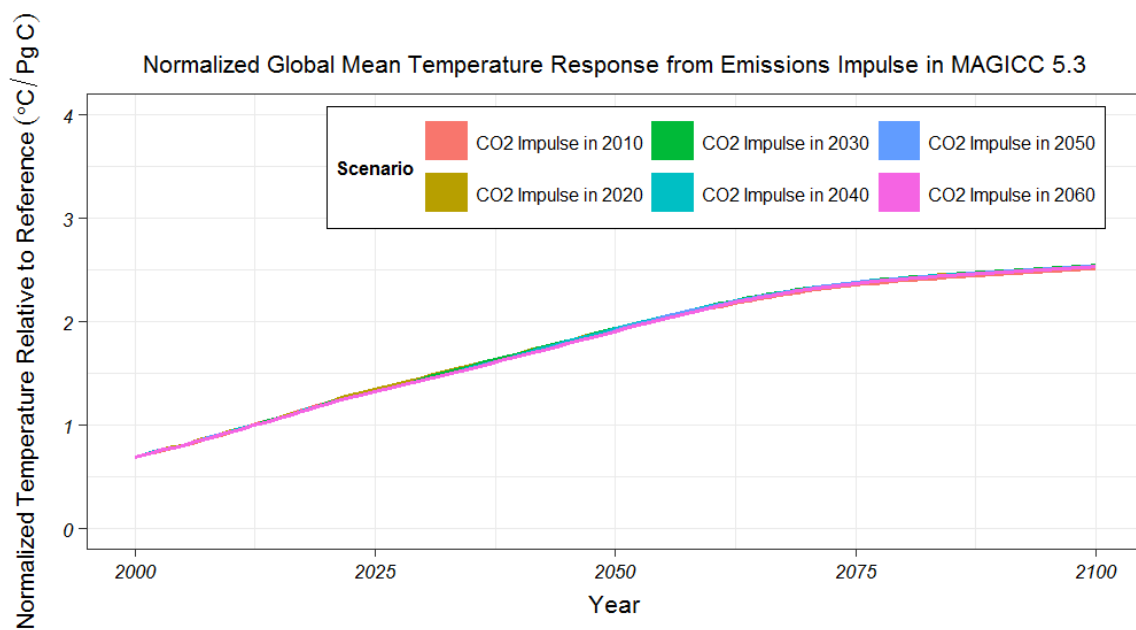

**Figure S1** Normalized global mean temperature response from  $CO_2$  emissions impulses in MAGICC 5.3 carried out in different years.

290

## **S4.2 Impact of Emissions Pulses Size on Temperature Response**

In the main text we carried out annual emissions perturbations equivalent to doubling the value in 2015 to avoid model base years. Figure S2 shows the global mean temperature response normalized by the perturbation size for different CO<sub>2</sub> perturbation sizes in 2015 in MAGICC 5.3. We found there was a maximum difference of 0.0015°C/PgC, and thus we continued our experiments using only one perturbation value.

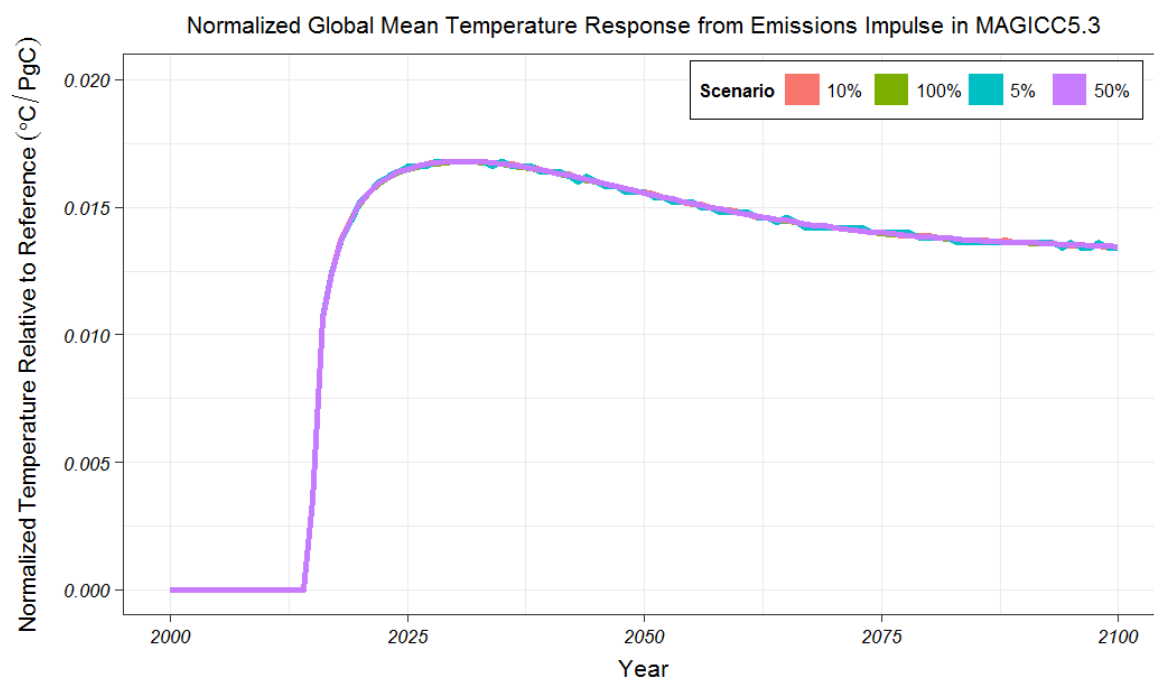

**Figure S2** Normalized global mean temperature response from different sized  $CO_2$  emissions impulses in MAGICC 5.3 in 2015.

## **S5 Adjusted Total Forcing Response**

We found that MAGICC 5.3, MAGICC 6.0, and Hector v2.0 respond similarly to a CO<sub>2</sub> concentration impulse, with differences in the forcing and temperature responses arising from the treatment of time within each model. Hector v2.0, for example, reads in end-of-year emissions and carries out calculations of concentration, forcing, and temperature using that same classification of time. MAGICC 5.3 and MAGICC 6.0 read in end-of-year emissions and calculate concentration, forcing, and temperature at mid-year values, and successively reports temperature at the end-of year. This change in the timing effects the impulse response by distributing the pulse over more time periods. Here, we offer an adjustment for the forcing response to a CO<sub>2</sub> concentration impulse.



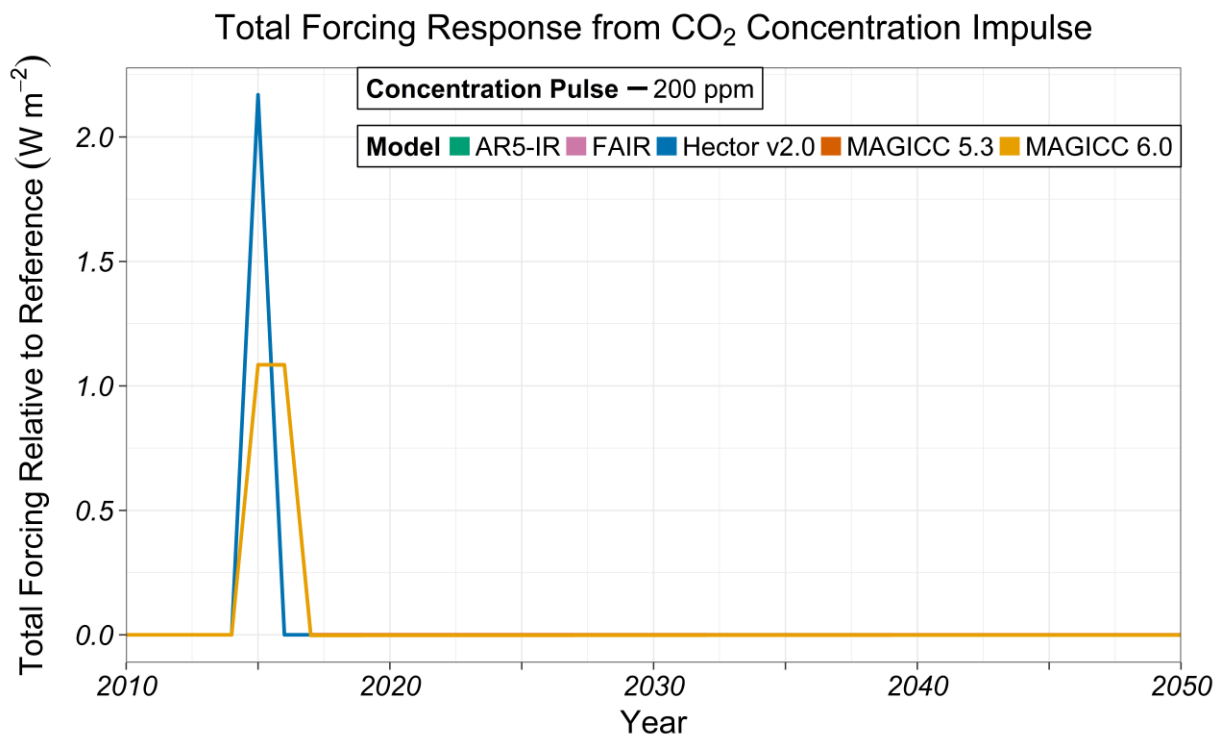

315

**Figure S3** Total forcing response from a CO<sub>2</sub> concentration impulse in SCMs. All three SCMs have a collinear response (MAGICC 6.0 – yellow, MAGICC 5.3 BC-OC – red, Hector v2.0 – blue, AR5-IR – green, FAIR –pink).

Due to the differences in model treatment of time, we offer a correction to the forcing in two of the SCMs. MAGICC 5.3 and MAGICC 6.0 calculate forcing in mid-year, while Hector v2.0 reports forcing at the end of a year. The result is a broadened impulse response peak in both versions of MAGICC, compared to Hector v2.0. The total forcing response from both version of MAGICC, however, can be adjusted with the following equation:

$$F_i = (2xf_i) - f_{i-1} \quad (8)$$

where  $F_i$  is the adjusted forcing,  $f_i$  is the unadjusted forcing at the current time step, and  $f_{i-1}$  is the unadjusted forcing at the previous time step.

Figure S4 shows the total forcing response adjusted from mid-year reporting, to end-year reporting using equation (SI. Eqn. 8). We can also apply this adjustment to the BC impulse, however, the MAGICC 6.0 distribution is larger in this case.

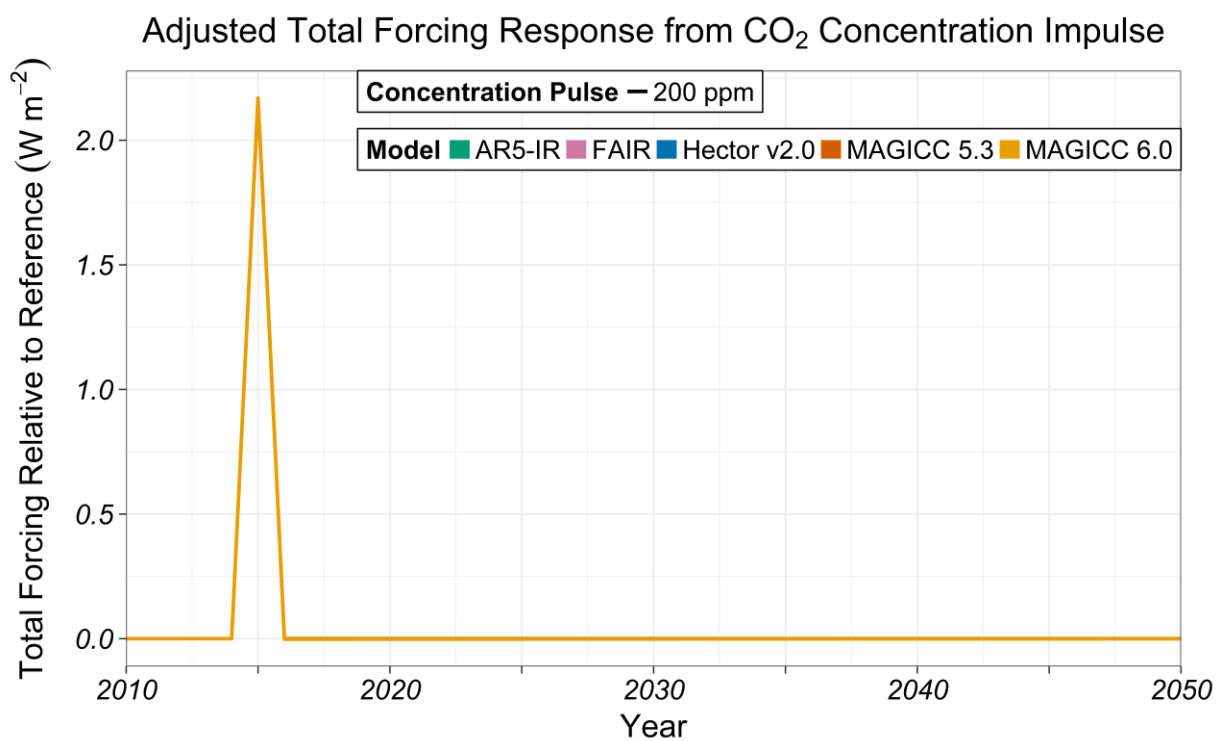

**Figure S4** Total forcing response from a CO<sub>2</sub> concentration impulse in SCMs. All three SCMs have a collinear response (MAGICC 6.0 – yellow, MAGICC 5.3 BC-OC – red, Hector v2.0 – blue, AR5-IR – green, FAIR –pink).

## **S6 Total Forcing Response from BC Emissions Impulse**

340

We see in Figure S5 that the model responses to a pulse of BC have similar patterns of instantaneous behavior seen in Fig. 1 from the CO<sub>2</sub> concentration pulse. In general, the models behave similarly in response to a BC pulse; Hector v2.0 and AR5-IR have a collinear response, while MAGICC 6.0 distributes the BC emissions pulse over 3 years.

345

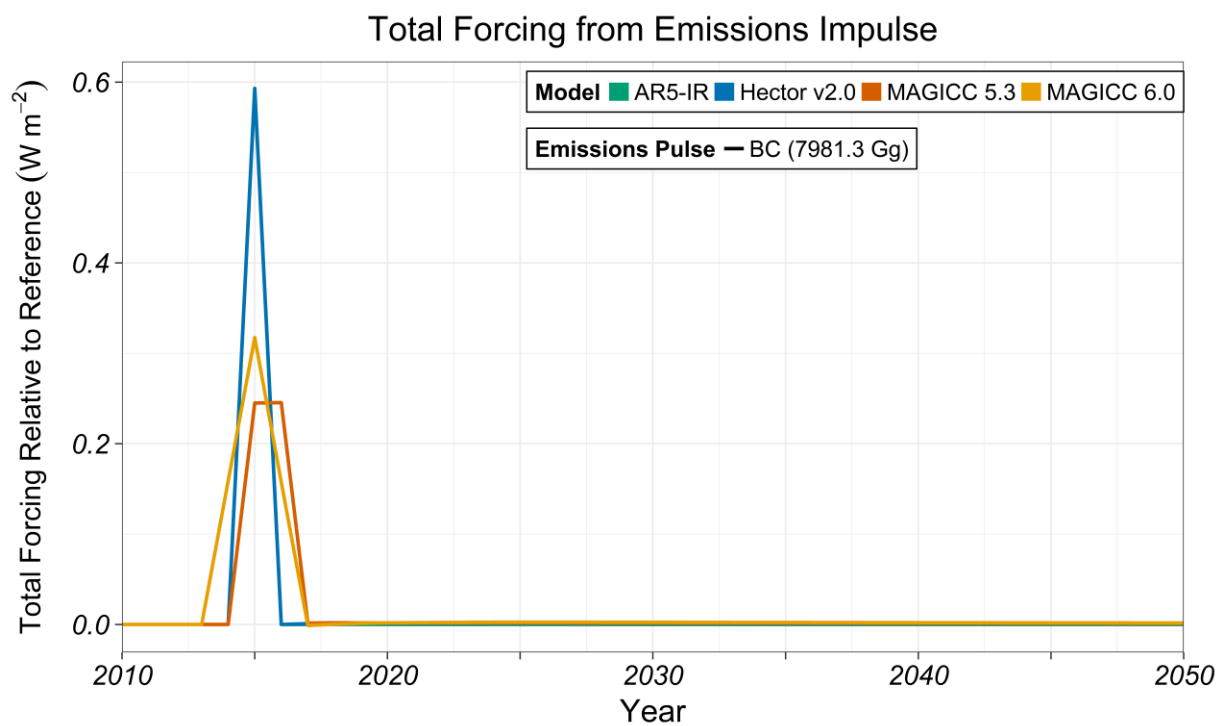

**Figure S5** Total forcing response from a BC emissions perturbation in SCMs (MAGICC 6.0 – yellow, MAGICC 5.3 BC-OC – red, Hector v2.0 – blue, AR5-IR-green). AR5-IR and Hector v2.0 are collinear.

350

## **S7 CO<sub>2</sub> Concentration Responses from Emissions Impulses**

Figure S6 shows the CO<sub>2</sub> concentration responses from a BC and CH<sub>4</sub> emissions pulse. Every model response shows an eventual CO<sub>2</sub> concentration increases from a BC impulse; a secondary effect from the temperature increase. From a CH<sub>4</sub> and BC emissions pulse, the CO<sub>2</sub> concentration response is stronger in MAGICC 6.0, followed by MAGICC 5.3 and Hector v2.0. MAGICC 6.0, however, shows an initial decrease in CO<sub>2</sub> concentration response from the BC pulse.

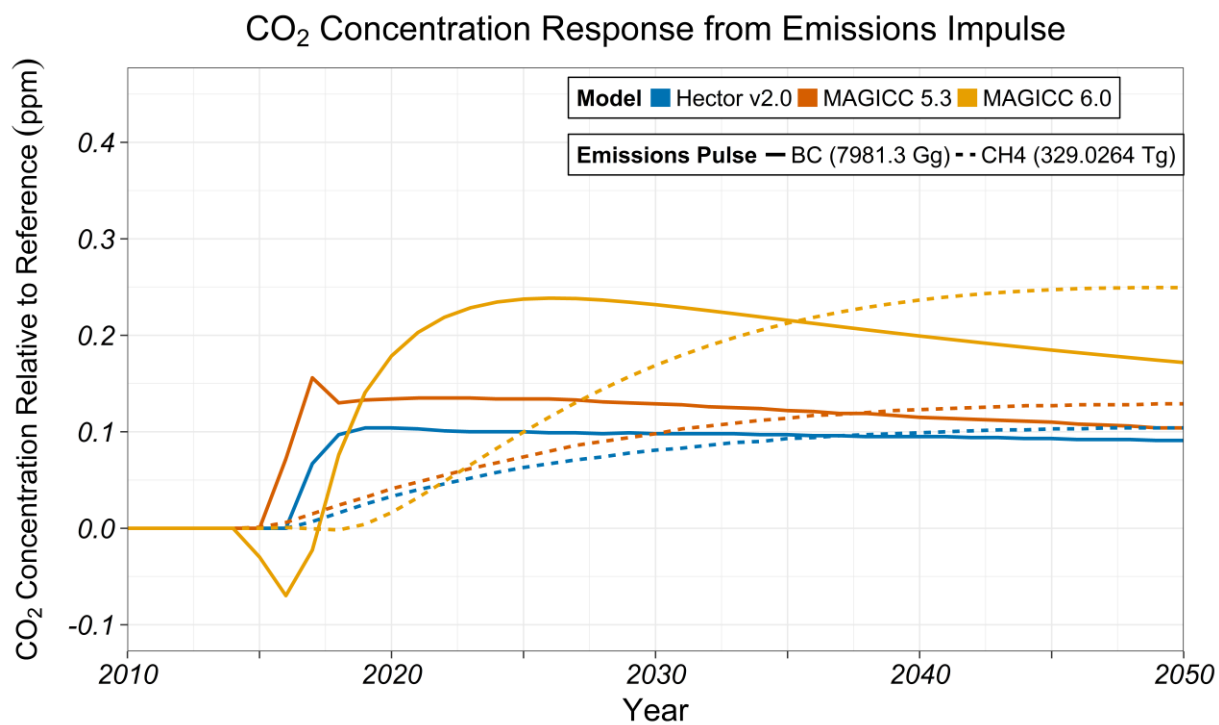

**Figure S6** CO<sub>2</sub> concentration response from CH<sub>4</sub> and BC emissions perturbation (B) in SCMs (MAGICC 6.0 – yellow, MAGICC 5.3 BC-OC – red, Hector v2.0 – blue) illustrating the carbon-cycle feedbacks present in each model.

Figure S6 also shows that CH<sub>4</sub> emission perturbations impact CO<sub>2</sub> concentration within both versions of MAGICC. The discrepancy between the MAGICC and Hector responses is partly due to CH<sub>4</sub> oxidation in MAGICC 5.3. The MAGICC 6.0 response is larger in Figure S6 because of the temporal distribution of the pulse, however the general shape of the response is similar to the other two SCMs.

AR5-IR is notably absent from Figure S6 because, in this IRF, the CO<sub>2</sub> concentration is not affected by rising temperature or CO<sub>2</sub> accumulation from BC or CH<sub>4</sub> emissions perturbations (Millar et al. 2017). Similarly, the FAIR model (Millar et al. 2017) is absent from Figure S6. The CO<sub>2</sub> concentration response to a CO<sub>2</sub> emissions impulse in FAIR can be seen in Figure S8.

The CH<sub>4</sub> chemistry components in Hector v2.0 and MAGICC 5.3 BC-OC are nearly identical, accounting for the similarities between these two SCMs responses (C. A. Hartin et al. 2015). MAGICC 5.3, however, includes CH<sub>4</sub> oxidation to CO<sub>2</sub>, which might account for this response difference. To test this, Figure S7 shows the CO<sub>2</sub> concentration response from emissions impulse in SCMs. MAGICC 5.3 is shown with and without CH<sub>4</sub> oxidation included for a clearer comparison the Hector v2.0 response. With the CH<sub>4</sub> oxidation turned off, the MAGICC 5.3 BC-OC response is similar to Hector v2.0 with only a slight difference after 2025.



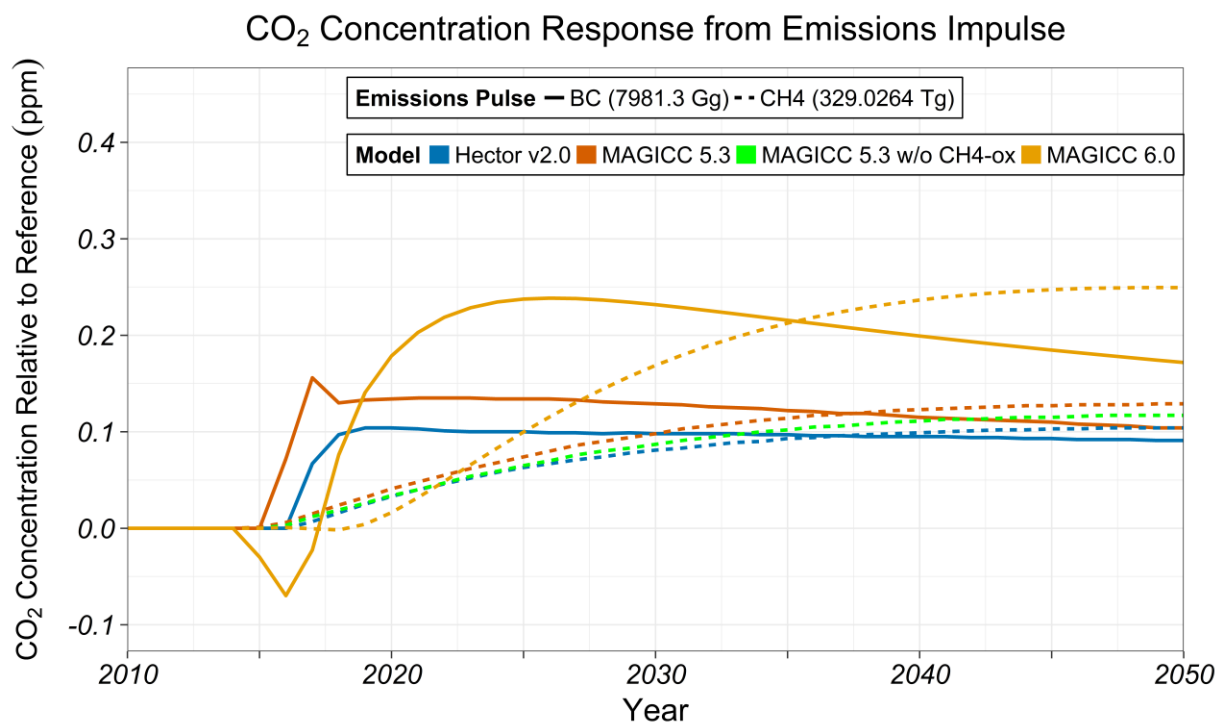

**Figure S7** CO<sub>2</sub> concentration response from emissions impulse in SCMs. MAGICC 5.3 is shown with and without CH<sub>4</sub> oxidation included (MAGICC 6.0 – yellow, MAGICC 5.3 BC-OC – red, Hector v2.0 – blue)..

## **S8 Model Responses out to 2300**

Figure S8 - Figure S12 show the CO<sub>2</sub> concentration response, total forcing response, and global mean temperature response from an emissions impulse, respectively, to the end of the model period equal to 2300.

### **S8.1 CO<sub>2</sub> Concentration Response to a CO<sub>2</sub> Emissions Pulse**

Figure S8 shows the CO<sub>2</sub> concentration response from a CO<sub>2</sub> emissions pulse in the SCMs out to 2300. We see that the SCMs respond similarly to this perturbation, with the exception of the stylized SCM, FAIR, which has a weaker response.

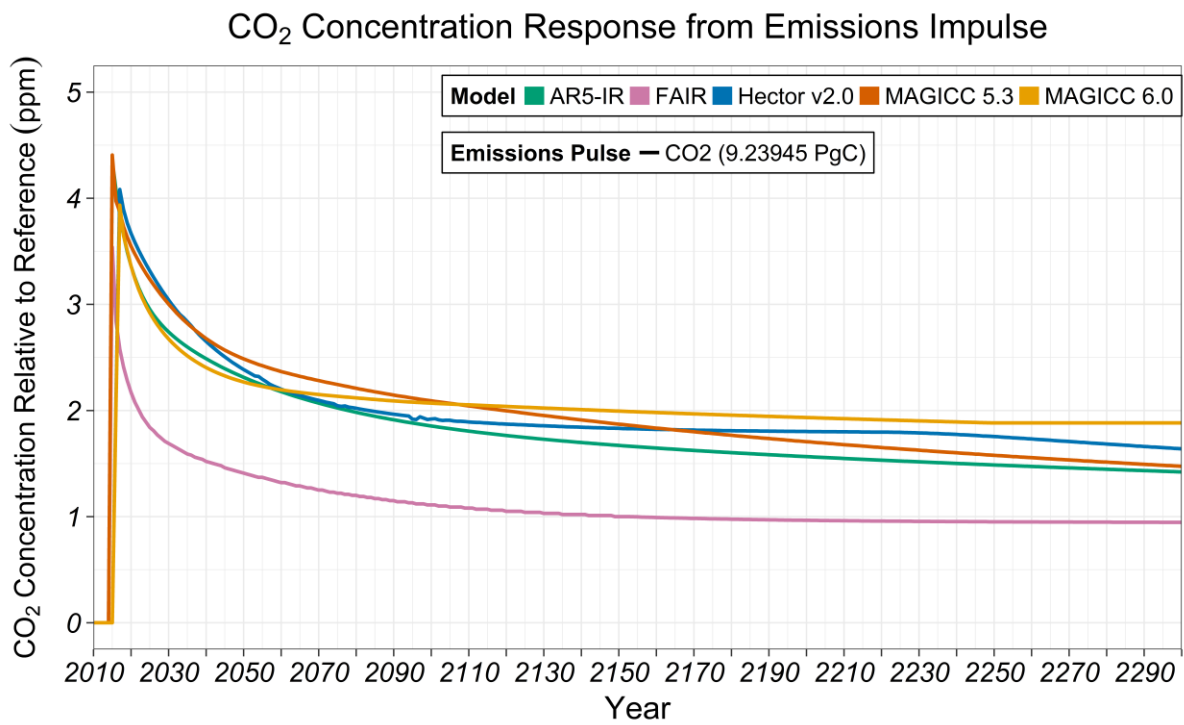

400

**Figure S8** Carbon dioxide concentration response from a CO<sub>2</sub> emissions pulse in SCMs (MAGICC 6.0 – yellow, MAGICC 5.3 BC-OC – red, Hector v2.0 – blue, AR5-IR – green, FAIR – pink).

## **S8.2 CH<sub>4</sub> Concentration Response from CH<sub>4</sub> Emissions Pulse**

Figure S9 shows the CH<sub>4</sub> concentration response from a CH<sub>4</sub> emissions pulse in the  
405 comprehensive SCMs out to 2300. The stylized SCMs do not report CH<sub>4</sub> concentrations. We see  
that the comprehensive SCMs behave similarly in their response to this perturbation, especially  
after 2050 when the response tends towards 0 ppb.

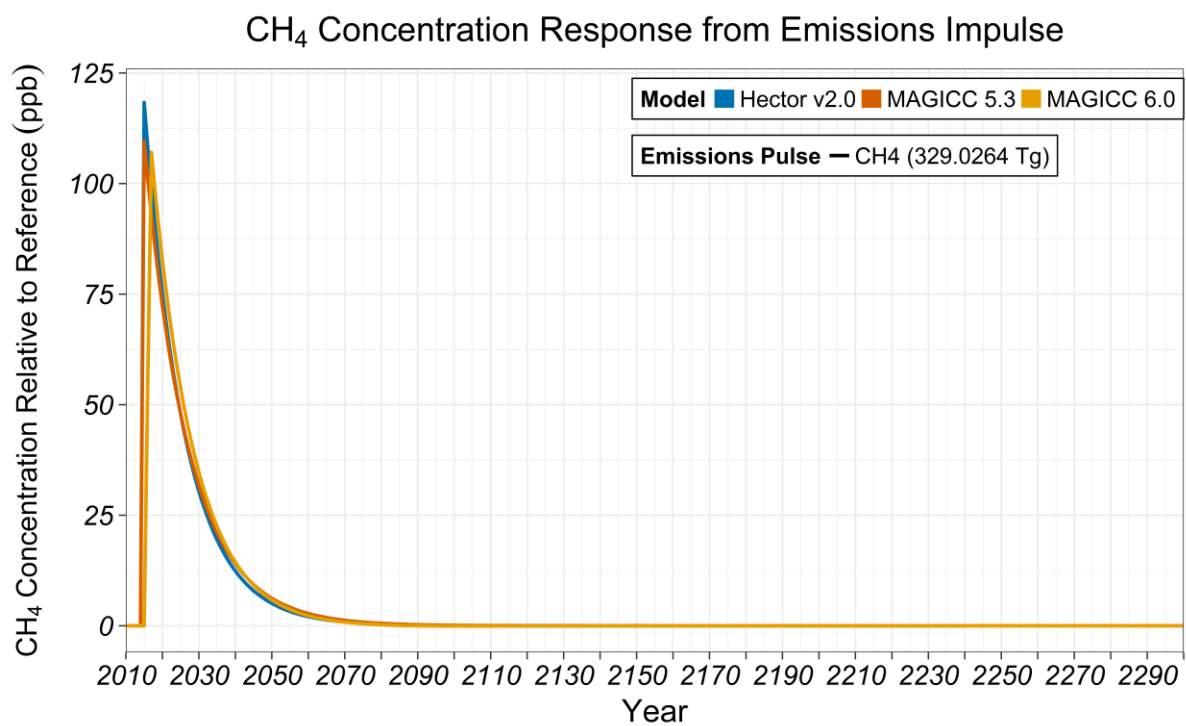

**Figure S9** Methane concentration response from a  $CH_4$  emissions pulse in SCMs out to 2300 (MAGICC 6.0 – yellow, MAGICC 5.3 BC-OC – red, Hector v2.0 – blue).

### **S8.3 CO<sub>2</sub> Concentration Response to a BC or CH<sub>4</sub> Emissions Pulse**

415

Figure S10 shows the CO<sub>2</sub> concentration response from a CH<sub>4</sub> and BC emissions perturbations in the SCMs out to 2300. We see that the SCMs behave differently across the entire time series.

Hector v2.0 changes state after 2225, a feature being investigated by the modeling team who originally calibrated the model out to 2300.

420

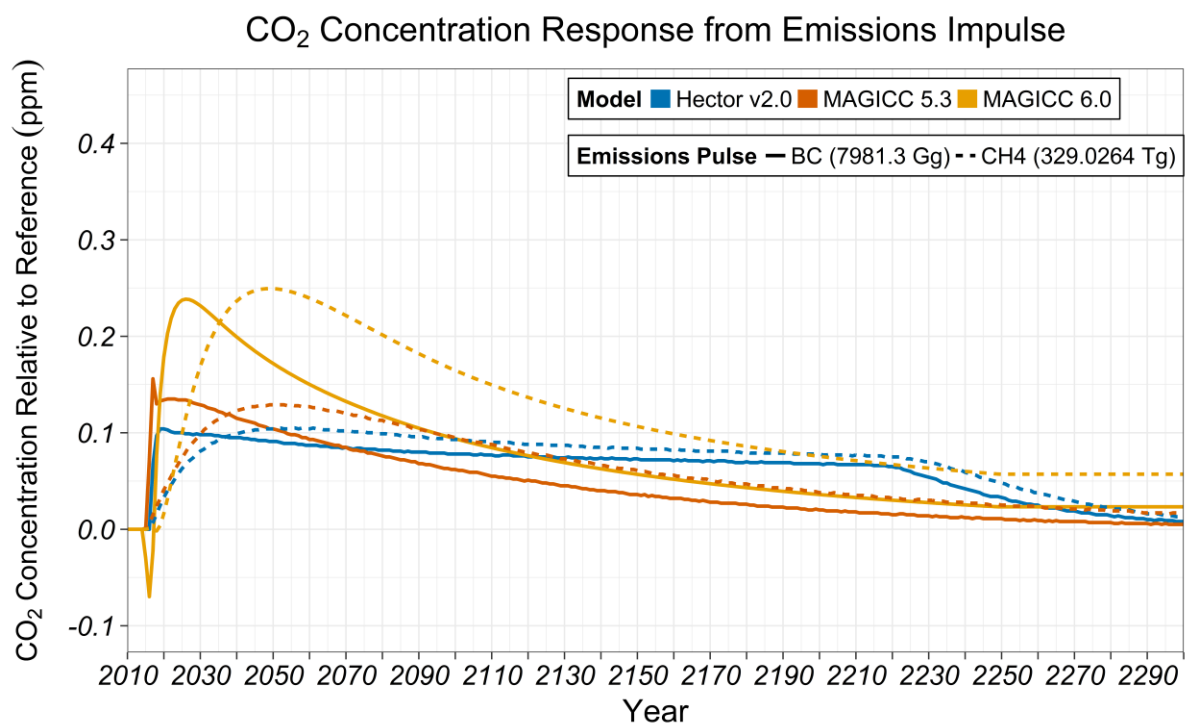

425

**Figure S10** CO<sub>2</sub> concentration response from emissions perturbations in SCMs out to 2300 (MAGICC 6.0 – yellow, MAGICC 5.3 BC-OC – red, Hector v2.0 – blue).

#### **S8.4 Total Forcing Response to a CO<sub>2</sub> or CH<sub>4</sub> Emissions Pulse**

- 430 We report the total forcing response from the models, rather than the individual species' forcing responses for comparability. This has little impact on the results because, in the case of the non-CO<sub>2</sub> species, the total forcing is dominated by the CO<sub>2</sub> response, which is removed by subtracting the reference case.
- 435 Figure S11 shows the total forcing response from a CH<sub>4</sub> and CO<sub>2</sub> emissions perturbations in the SCMs out to 2300. FAIR does not report total forcing.



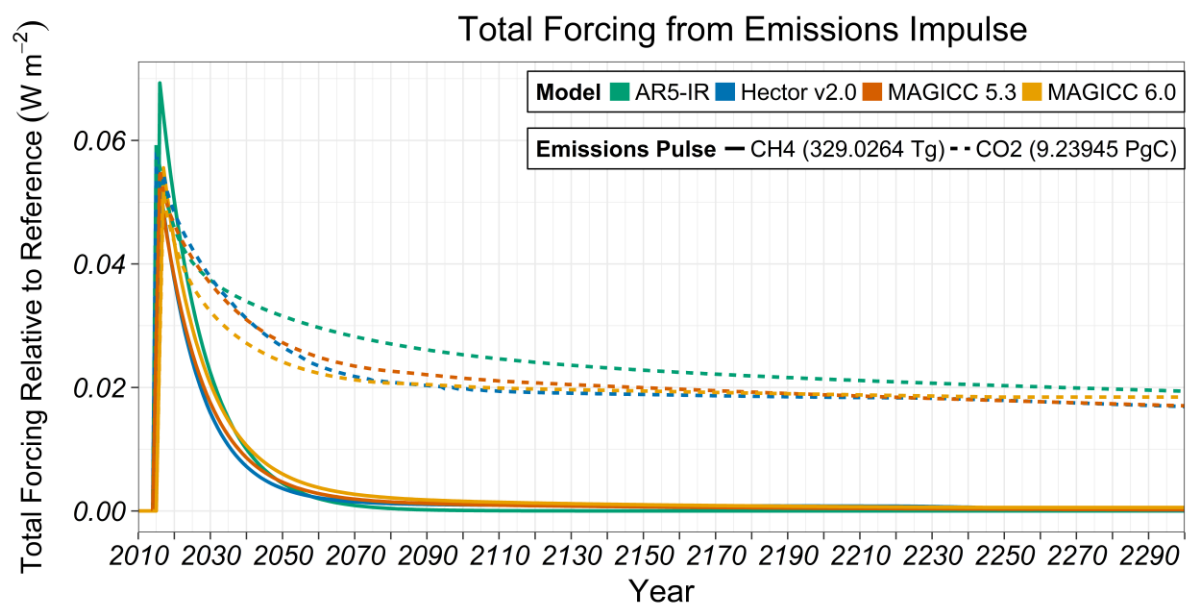

440

**Figure S11** Total forcing response from emissions perturbations in SCMs out to 2300 (MAGICC 6.0 – yellow, MAGICC 5.3 BC-OC – red, Hector v2.0 – blue, AR5-IR – green).

### **S8.5 Global Mean Temperature Response to a CH<sub>4</sub> or CO<sub>2</sub> Emissions Pulse**

445 Figure S12 shows the temperature response from a CH<sub>4</sub> and CO<sub>2</sub> emissions perturbations in the SCMs out to 2300. We see that most of the SCM responses differ slightly immediately following the perturbation, but converge over time. AR5-IR has a stronger response than the other SCMs immediately following the perturbation. More details are included in the main paper.

450

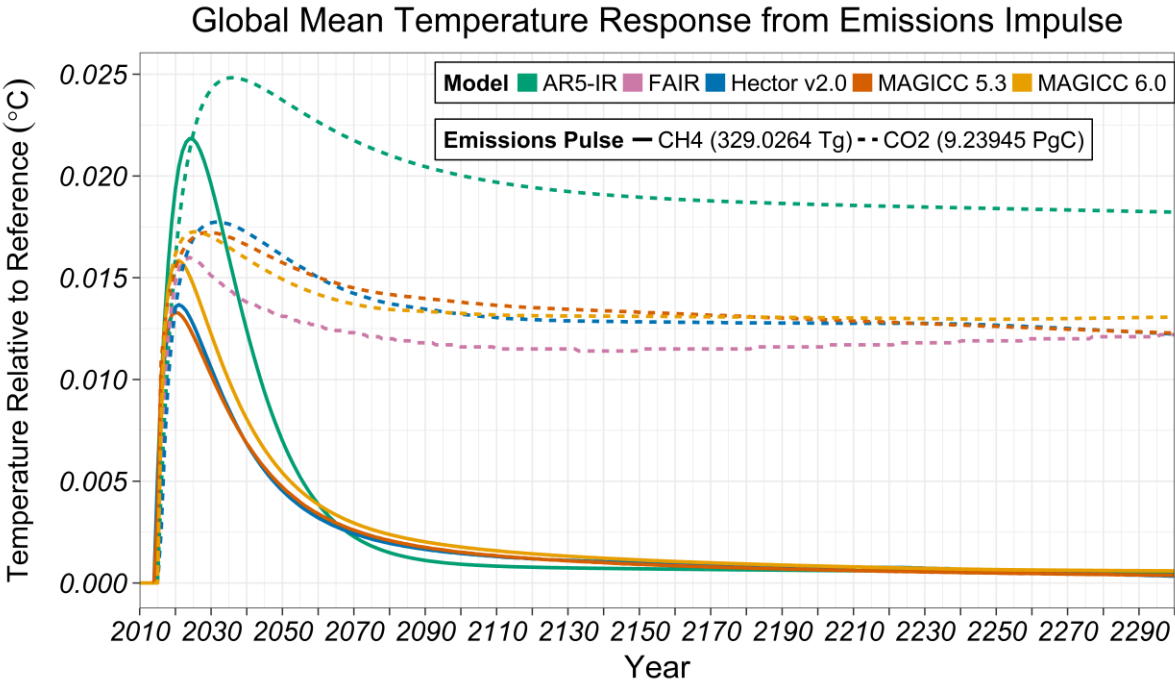

**Figure S12** Global mean temperature response from emissions perturbations in SCMs out to 2300 (MAGICC 6.0 – yellow, MAGICC 5.3 BC-OC – red, Hector v2.0 – blue, AR5-IR – green, FAIR - pink).

455

460

465

## S9 Time Integrated Responses

Figure S13 – Figure S18 shows the integrated forcing and temperature response for the full suite of experiments to the end of the model period. The data tables in this section provide numerical data (rounded to three significant figures) supporting the integrated forcing or temperature response figures. The data tables also include percent differences found using the following formula:

$$\text{Percent Difference}_{i,t} = \left( \frac{\text{Model response}_{i,t} - \text{Average Comprehensive Model Response}_t}{\text{Average Comprehensive Model Response}_t} \right) \times 100 \quad (9)$$

where  $t$  is the time horizon and  $i$  is the individual model. A positive percent difference indicates that the model response is stronger than the average comprehensive model response, while a negative value indicates the model response was weaker than the average comprehensive model response.

### S9.1 Time Integrated Responses from a CO<sub>2</sub> Concentration Impulse

Figure S13 shows the time integrated total forcing response from a CO<sub>2</sub> concentration impulse.

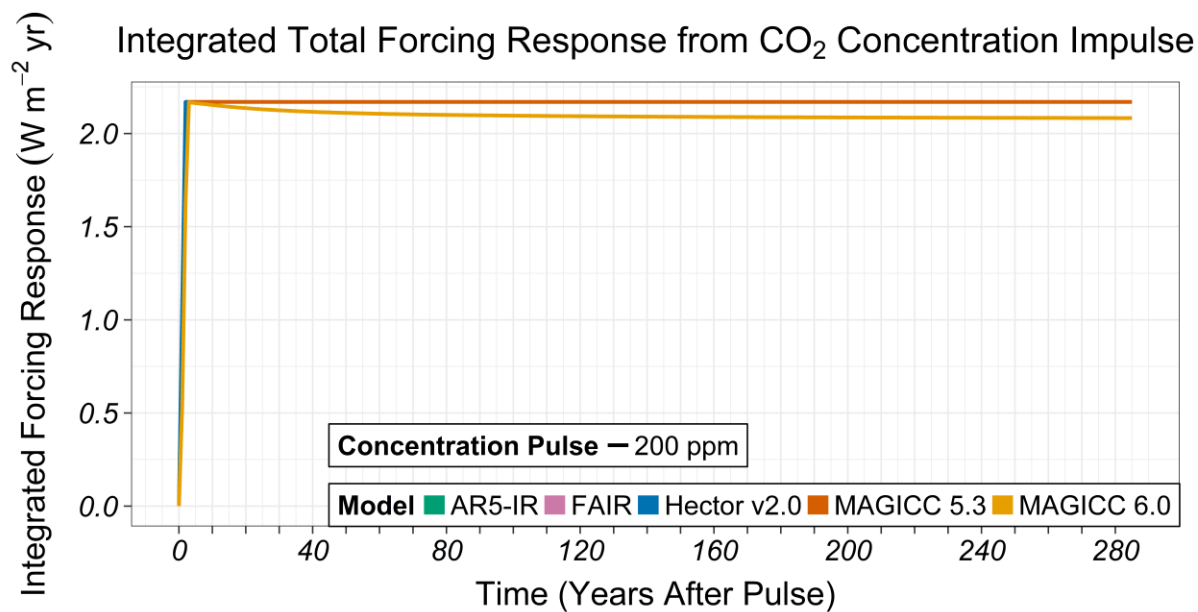

**Figure S13** Time integrated forcing response from a CO<sub>2</sub> concentration impulse for the SCMs to the end of the model period (MAGICC 6.0 – yellow, MAGICC 5.3 BC-OC – red, Hector v2.0 – blue, AR5-IR – green, FAIR – pink).

Figure S14 shows the time integrated global mean temperature response from a CO<sub>2</sub> concentration impulse to the end of the model period. We see that the comprehensive SCMs respond similarly, while AR5-IR has a stronger response and FAIR, a slightly weaker response.

495 The associated values time integrated temperature responses are in Table S3.

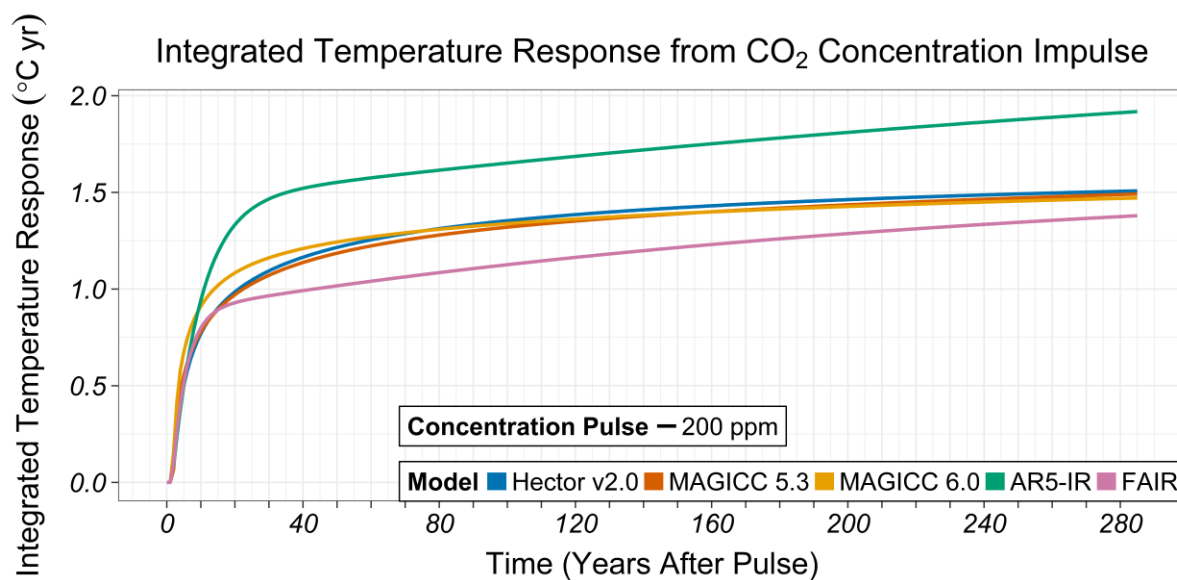

**Figure S14** Time integrated temperature response from a CO<sub>2</sub> concentration impulse for the SCMs to the end of the model period (MAGICC 6.0 – yellow, MAGICC 5.3 BC-OC – red, Hector v2.0 – blue, AR5-IR – green, FAIR - pink).

507 **Table S3** Integrated Temperature Responses from a CO<sub>2</sub> Concentration Impulse in the SCMs

508

| Time<br>After<br>Pulse | Integrated Temperature Response (°Cyr) |               |             |      |        |                                     | Percent Difference from Comprehensive SCMs Average (%) |               |             |       |        |
|------------------------|----------------------------------------|---------------|-------------|------|--------|-------------------------------------|--------------------------------------------------------|---------------|-------------|-------|--------|
|                        | MAGICC<br>5.3 BC-OC                    | MAGICC<br>6.0 | Hector v2.0 | FAIR | AR5-IR | Average of<br>Comprehensive<br>SCMs | MAGICC<br>5.3 BC-OC                                    | MAGICC<br>6.0 | Hector v2.0 | FAIR  | AR5-IR |
| 10                     | 0.85                                   | 0.98          | 0.85        | 0.87 | 0.24   | 0.90                                | -4.79                                                  | 9.59          | -4.79       | -3.57 | -73.5  |
| 20                     | 1.00                                   | 1.11          | 1.02        | 0.94 | 1.10   | 1.04                                | -4.25                                                  | 6.29          | -2.04       | -9.80 | 5.33   |
| 50                     | 1.20                                   | 1.25          | 1.22        | 1.02 | 1.39   | 1.22                                | -2.07                                                  | 2.26          | -0.19       | -16.6 | 13.7   |
| 100                    | 1.32                                   | 1.34          | 1.35        | 1.13 | 1.65   | 1.34                                | -1.25                                                  | 0.25          | 1.00        | -15.5 | 23.4   |
| 150                    | 1.39                                   | 1.39          | 1.42        | 1.13 | 1.74   | 1.40                                | -0.71                                                  | -0.71         | 1.43        | -19.3 | 24.3   |
| 285                    | 1.46                                   | 1.47          | 1.51        | 1.38 | 1.92   | 1.48                                | -1.31                                                  | -0.63         | 1.94        | -6.71 | 29.8   |

509

510



## 511 **S9.2 Time Integrated Responses from a CO<sub>2</sub> Emissions Impulse**

512

513 Figure S15 and Figure S16 shows the integrated forcing (Table S4) and temperature response  
514 (Table S5) for the CO<sub>2</sub> emissions impulse experiment to the end of the model period,  
515 respectively. The numerical data is shows in the Table S4 and Table S5.

516

517

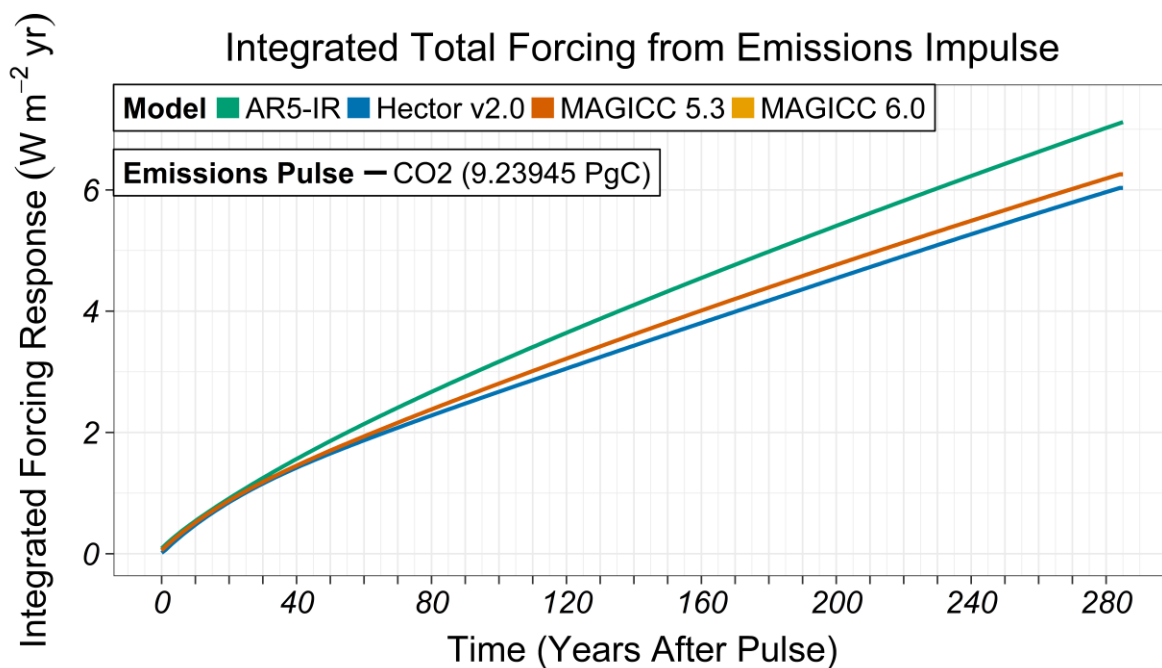

518

519 **Figure S15** Time integrated total forcing response from a CO<sub>2</sub> emissions impulse for the SCMs to the end of the  
 520 model period (MAGICC 6.0 – yellow, MAGICC 5.3 BC-OC – red, Hector v2.0 – blue, AR5-IR – green).

521

522

523

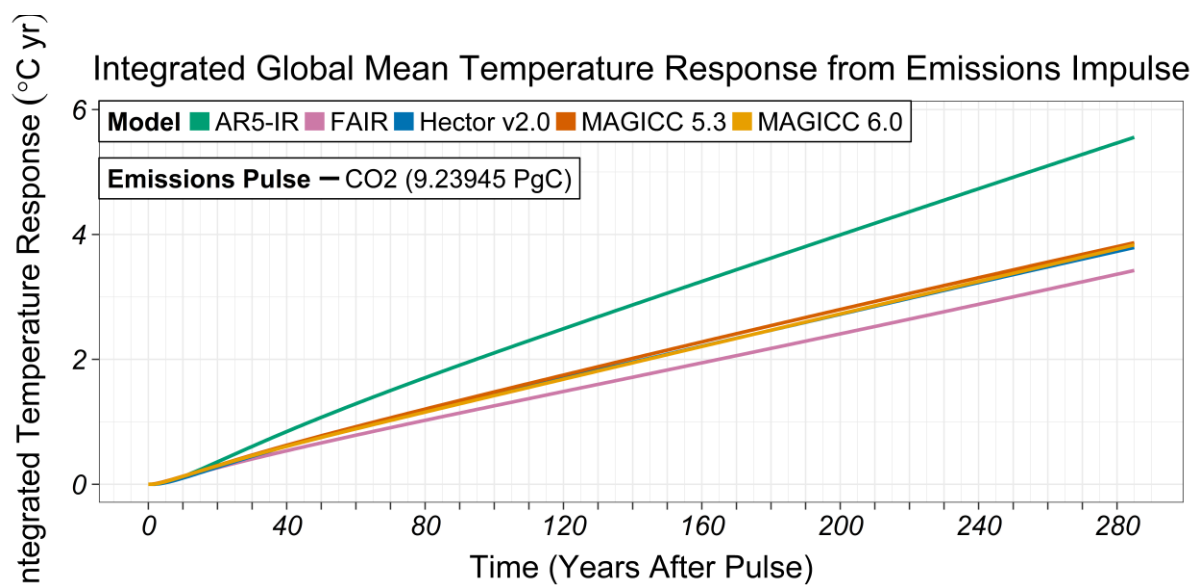

524

525 **Figure S16** Time integrated temperature response from a CO<sub>2</sub> emissions impulse for the SCMs to the end of the  
 526 model period (MAGICC 6.0 – yellow, MAGICC 5.3 BC-OC – red, Hector v2.0 – blue, AR5-IR – green, FAIR - pink).

527

528

529 **Table S4** Integrated Forcing Responses from a CO<sub>2</sub> Emissions Impulse in the SCMs

530

| Time<br>After<br>Pulse | Integrated Forcing Response (Wm <sup>2</sup> yr) |               |                |            |                                     | Percent Difference from Comprehensive SCMs Average (%) |            |             |        |
|------------------------|--------------------------------------------------|---------------|----------------|------------|-------------------------------------|--------------------------------------------------------|------------|-------------|--------|
|                        | MAGICC<br>5.3 BC-<br>OC                          | MAGICC<br>6.0 | Hector<br>v2.0 | AR5-<br>IR | Average of<br>Comprehensive<br>SCMs | MAGICC 5.3<br>BC-OC                                    | MAGICC 6.0 | Hector v2.0 | AR5-IR |
| 10                     | 0.51                                             | 0.43          | 0.48           | 0.54       | 0.47                                | 8.67                                                   | -9.51      | 0.85        | 14.38  |
| 20                     | 0.88                                             | 0.75          | 0.85           | 0.91       | 0.82                                | 6.39                                                   | -9.38      | 2.99        | 10.63  |
| 50                     | 1.70                                             | 1.48          | 1.65           | 1.86       | 1.61                                | 5.63                                                   | -8.28      | 2.65        | 15.38  |
| 100                    | 2.81                                             | 2.50          | 2.67           | 3.17       | 2.66                                | 5.52                                                   | -5.96      | 0.44        | 19.13  |
| 150                    | 3.82                                             | 3.47          | 3.62           | 4.32       | 3.63                                | 4.97                                                   | -4.52      | -0.45       | 18.87  |
| 285                    | 6.26                                             | 5.97          | 6.03           | 7.12       | 6.09                                | 2.79                                                   | -1.89      | -0.90       | 16.98  |

531

532

533

534 **Table S5** Integrated Temperature Responses from a CO<sub>2</sub> Emissions Impulse in the SCMs

535

| Time After Pulse | Integrated Temperature Response (°Cyr) |            |             |      |        |                               | Percent Difference from Comprehensive SCMs Average (%) |            |             |        |        |
|------------------|----------------------------------------|------------|-------------|------|--------|-------------------------------|--------------------------------------------------------|------------|-------------|--------|--------|
|                  | MAGICC 5.3 BC-OC                       | MAGICC 6.0 | Hector v2.0 | FAIR | AR5-IR | Average of Comprehensive SCMs | MAGICC 5.3 BC-OC                                       | MAGICC 6.0 | Hector v2.0 | FAIR   | AR5-IR |
| 10               | 0.16                                   | 0.16       | 0.13        | 0.14 | 0.18   | 0.15                          | 6.81                                                   | 5.49       | -12.31      | -5.71  | 20.66  |
| 20               | 0.33                                   | 0.33       | 0.31        | 0.29 | 0.42   | 0.32                          | 2.99                                                   | 1.44       | -4.43       | -9.38  | 29.90  |
| 50               | 0.81                                   | 0.78       | 0.79        | 0.69 | 1.00   | 0.79                          | 1.86                                                   | -1.69      | -0.17       | -13.07 | 26.15  |
| 100              | 1.50                                   | 1.45       | 1.46        | 1.27 | 1.93   | 1.47                          | 2.16                                                   | -1.59      | -0.57       | -13.51 | 31.44  |
| 150              | 2.17                                   | 2.10       | 2.10        | 1.85 | 2.86   | 2.12                          | 2.20                                                   | -1.10      | -1.10       | -12.87 | 34.69  |
| 285              | 3.87                                   | 3.85       | 3.80        | 3.44 | 5.87   | 3.84                          | 0.83                                                   | 0.17       | -1.00       | -10.38 | 52.93  |

### **S9.3 Time Integrated Responses from a CH<sub>4</sub> Emissions Impulse**

Figure S17 and Figure S18 shows the integrated forcing (Table S6) and temperature response (Table S7) for the CH<sub>4</sub> emissions impulse experiment to the end of the model period. The numerical data in Table S6 and Table S7.

543

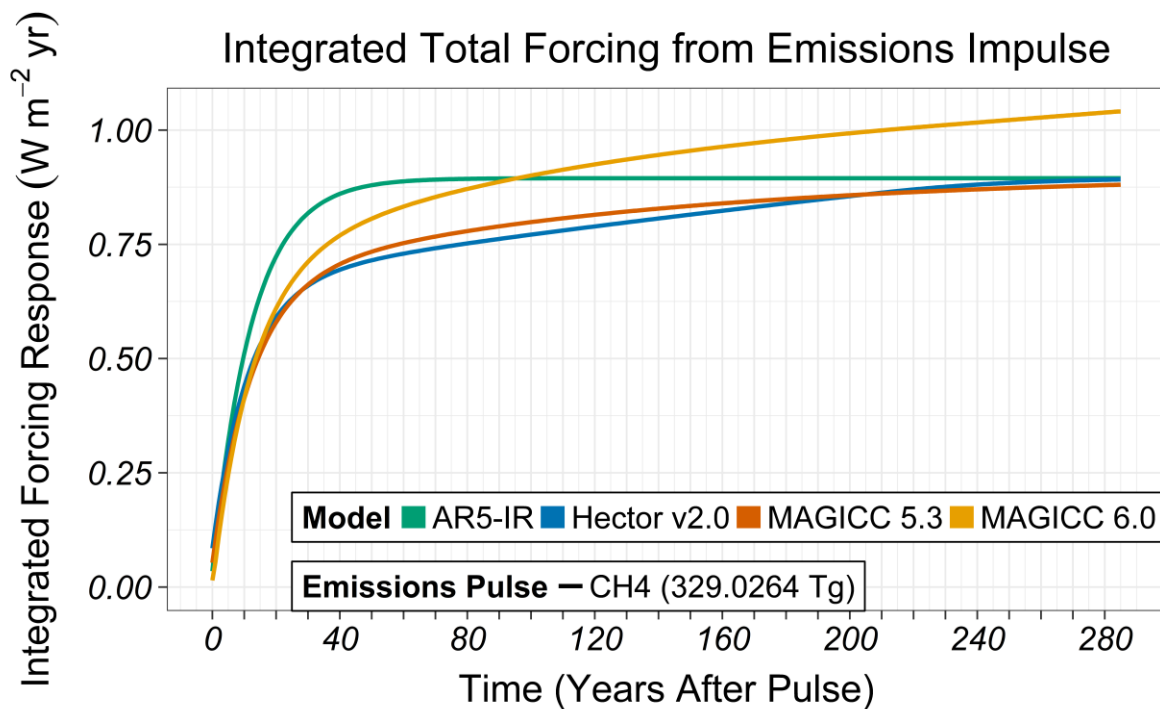

544

545 **Figure S17** Time integrated total forcing response from a  $\text{CH}_4$  emissions impulse for the SCMs to the end of the  
 546 model period (MAGICC 6.0 – yellow, MAGICC 5.3 BC-OC – red, Hector v2.0 – blue, AR5-IR – green).

547

548

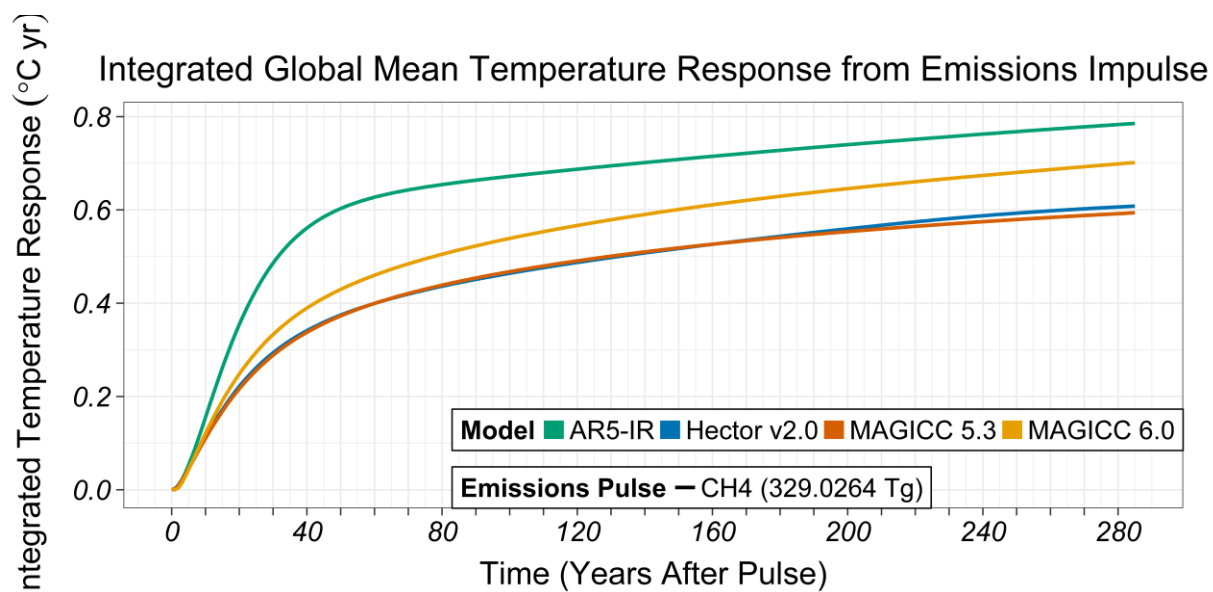

549

550 **Figure S18** Time integrated temperature response from a CO<sub>2</sub> emissions impulse for the SCMs to the end of the  
 551 model period (MAGICC 6.0 – yellow, MAGICC 5.3 BC-OC – red, Hector v2.0 – blue, AR5-IR – green, FAIR - pink).



552

553 **Table S6** Integrated Forcing Responses from a CH<sub>4</sub> Emissions Impulse in the SCMs

| Time After Pulse | Integrated Forcing Response (Wm <sup>-2</sup> yr) |            |             |        |                               | Percent Difference from Comprehensive SCMs Average (%) |            |             |        |
|------------------|---------------------------------------------------|------------|-------------|--------|-------------------------------|--------------------------------------------------------|------------|-------------|--------|
|                  | MAGICC 5.3 BC-OC                                  | MAGICC 6.0 | Hector v2.0 | AR5-IR | Average of Comprehensive SCMs | MAGICC 5.3 BC-OC                                       | MAGICC 6.0 | Hector v2.0 | AR5-IR |
| 10               | 0.41                                              | 0.41       | 0.44        | 0.51   | 0.42                          | -2.14                                                  | -2.14      | 4.28        | 21.1   |
| 20               | 0.58                                              | 0.61       | 0.59        | 0.72   | 0.59                          | -2.31                                                  | 2.76       | -0.45       | 21.9   |
| 50               | 0.73                                              | 0.81       | 0.72        | 0.88   | 0.75                          | -2.44                                                  | 7.28       | -4.84       | 16.9   |
| 100              | 0.80                                              | 0.90       | 0.77        | 0.89   | 0.82                          | -3.04                                                  | 9.36       | -6.32       | 8.63   |
| 150              | 0.83                                              | 0.95       | 0.82        | 0.89   | 0.87                          | -3.88                                                  | 9.95       | -6.07       | 3.03   |
| 285              | 0.88                                              | 1.04       | 0.89        | 0.89   | 0.94                          | -6.01                                                  | 10.9       | -4.94       | -4.62  |

554

555

556 **Table S7** Integrated Temperature Responses from a CH<sub>4</sub> Emissions Impulse in the SCMs

| Time After Pulse | Integrated Temperature Response (°Cyr) |            |             |        |                               | Percent Difference from Comprehensive SCMs Average (%) |            |             |        |
|------------------|----------------------------------------|------------|-------------|--------|-------------------------------|--------------------------------------------------------|------------|-------------|--------|
|                  | MAGICC 5.3 BC-OC                       | MAGICC 6.0 | Hector v2.0 | AR5-IR | Average of Comprehensive SCMs | MAGICC 5.3 BC-OC                                       | MAGICC 6.0 | Hector v2.0 | AR5-IR |
| 10               | 0.13                                   | 0.15       | 0.14        | 0.16   | 0.14                          | -4.26                                                  | 7.10       | -2.83       | 17.2   |
| 20               | 0.23                                   | 0.27       | 0.24        | 0.36   | 0.25                          | -5.56                                                  | 8.68       | -3.12       | 47.4   |
| 50               | 0.38                                   | 0.44       | 0.38        | 0.45   | 0.40                          | -5.03                                                  | 9.55       | -4.52       | 12.3   |
| 100              | 0.47                                   | 0.54       | 0.47        | 0.58   | 0.49                          | -4.54                                                  | 9.88       | -5.35       | 17.4   |
| 150              | 0.52                                   | 0.60       | 0.52        | 0.70   | 0.55                          | -4.99                                                  | 10.2       | -5.17       | 28.1   |
| 285              | 0.60                                   | 0.70       | 0.61        | 0.85   | 0.64                          | -6.20                                                  | 10.5       | -4.31       | 33.5   |

#### **S9.4 Time Integrated Responses from a BC Emissions Impulse**

Figure S19 and Figure S20 shows the integrated forcing and temperature response for the BC emissions impulse experiment to the end of the model period, respectively. We used FAIR v1.0, which only represented the response from CO<sub>2</sub> emissions. An updated version, FAIR v1.3, was recently released and includes non-CO<sub>2</sub> forcing. SI. Table 8 shows the integrated temperature response data.

565

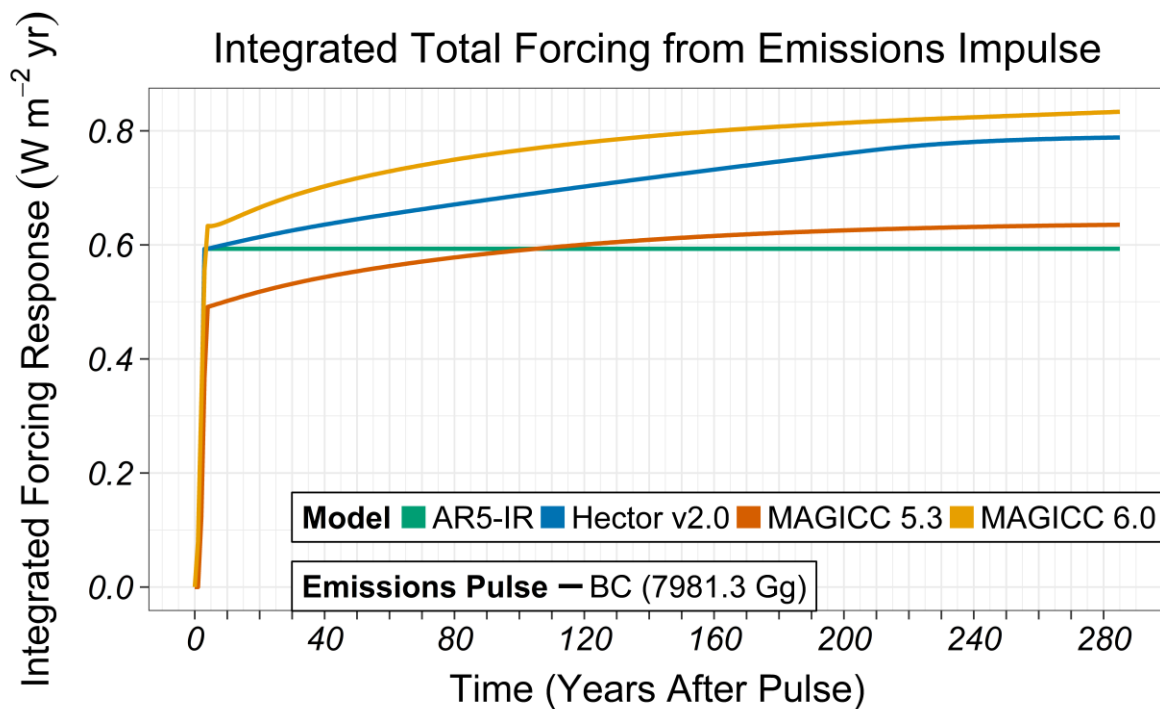

566

567 **Figure S19** Time integrated total forcing response from a BC emissions impulse for the SCMs to the end of the  
 568 model period (MAGICC 6.0 – yellow, MAGICC 5.3 BC-OC – red, Hector v2.0 – blue, AR5-IR – green).

569

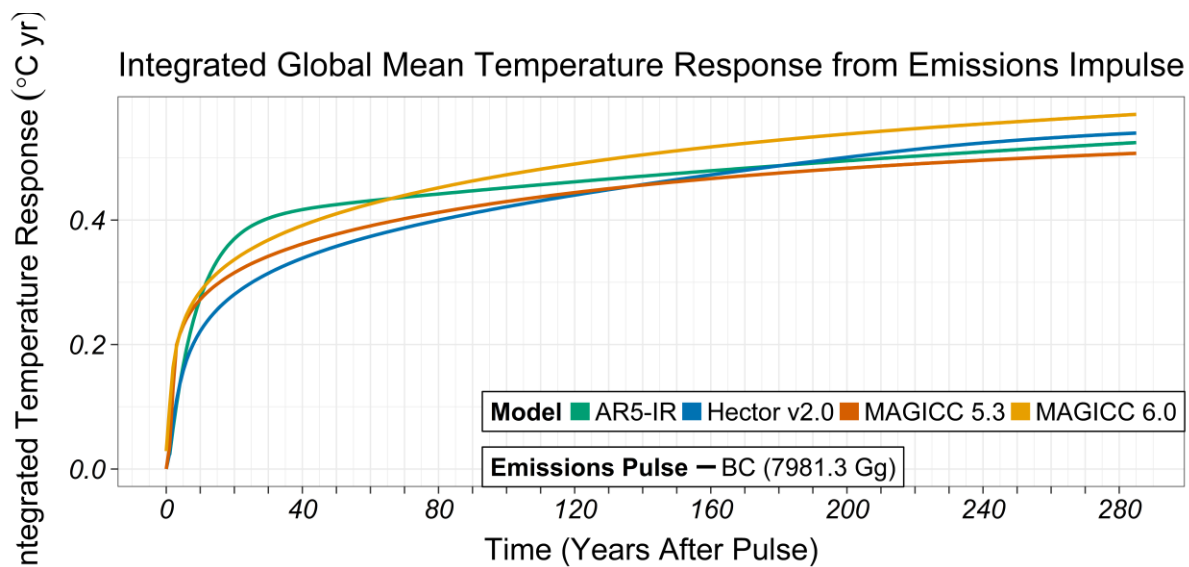

**Figure S20** Time integrated temperature response from a BC emissions impulse for the SCMs to the end of the model period (MAGICC 6.0 – yellow, MAGICC 5.3 BC-OC – red, Hector v2.0 – blue, AR5-IR – green, FAIR - pink).

577 We see that Hector v2.0, which does not differentiate BC forcing over land and ocean and has a  
578 9% weaker response 20 years after the pulse. MAGICC 6.0 diverges from the MAGICC 5.3  
579 temperature response 20 years after the pulse. AR5-IR represents the temperature response from  
580 a BC perturbation as a simple exponential decay analogous to the greenhouse gas IRF, leading to  
581 a much stronger integrated temperature response (20%) 20 years after the pulse.

582

583

584 **Table S8** Integrated Temperature Responses from a BC Emissions Impulse in the SCMs

| Time<br>After<br>Pulse | Integrated Temperature Response (°Cyr) |               |                |            |                                     | Percent Difference from Comprehensive SCMs Average (%) |            |             |        |
|------------------------|----------------------------------------|---------------|----------------|------------|-------------------------------------|--------------------------------------------------------|------------|-------------|--------|
|                        | MAGICC<br>5.3 BC-<br>OC                | MAGICC<br>6.0 | Hector<br>v2.0 | AR5-<br>IR | Average of<br>Comprehensive<br>SCMs | MAGICC 5.3<br>BC-OC                                    | MAGICC 6.0 | Hector v2.0 | AR5-IR |
| 10                     | 0.28                                   | 0.30          | 0.24           | 0.30       | 0.27                                | 3.91                                                   | 9.22       | -13.1       | 11.0   |
| 20                     | 0.32                                   | 0.34          | 0.29           | 0.38       | 0.32                                | 1.13                                                   | 8.12       | -9.25       | 19.3   |
| 50                     | 0.38                                   | 0.41          | 0.36           | 0.43       | 0.38                                | -1.22                                                  | 7.43       | -6.21       | 10.7   |
| 100                    | 0.43                                   | 0.47          | 0.42           | 0.45       | 0.44                                | -2.68                                                  | 7.12       | -4.44       | 2.22   |
| 150                    | 0.46                                   | 0.51          | 0.47           | 0.48       | 0.48                                | -3.80                                                  | 6.76       | -2.96       | -0.92  |
| 285                    | 0.51                                   | 0.57          | 0.54           | 0.53       | 0.54                                | -5.90                                                  | 5.73       | 0.17        | -2.56  |

585

586

587

588

589

590

591

592 **S10 Temporal Response of SCMs Compared to CMIP5**

593

594 Here we compare the 20-year moving average at time  $t=30$ ,  $t=50$ ,  $t=70$ ,  $t=100$ , and  $t=130$  in the  
595 CMIP5 models and SCMs to show the temporal response of temperature. Hector v2.0 and  
596 MAGICC 5.3 have a faster response than the other SCMs and the majority of the complex  
597 models to an abrupt  $4\times\text{CO}_2$  concentration step.

598



599

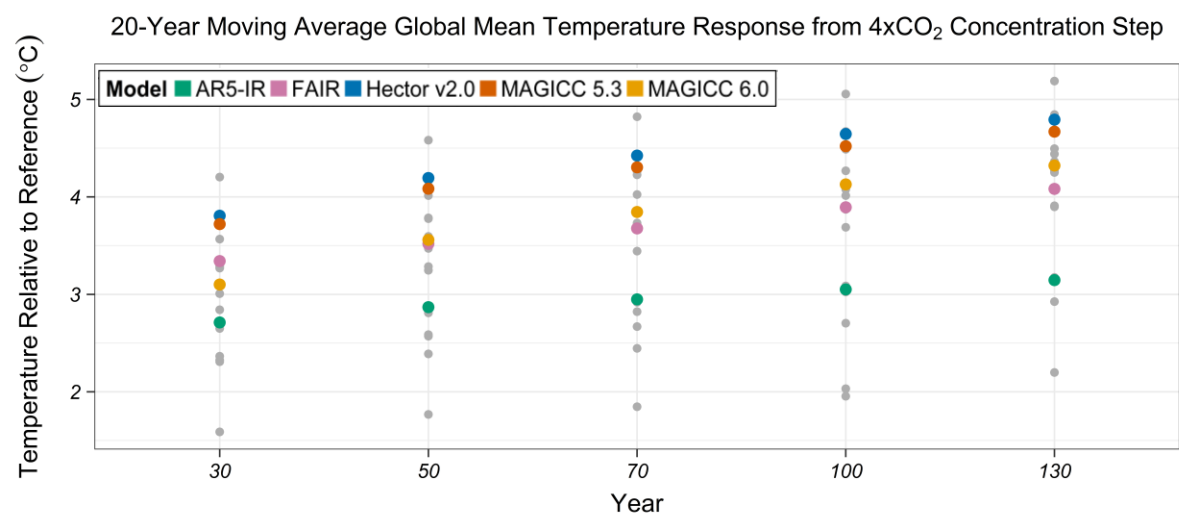

600

601 **Figure S21** 20-Year moving average centered at year shown of the global mean temperature response from 4xCO<sub>2</sub>  
602 concentration step in CMIP5 models (grey) and SCMs (MAGICC 6.0 – yellow, MAGICC 5.3 BC-OC – red, Hector  
603 v2.0 – blue, FAIR – pink, AR5-IR –green).

604

605

606 Table S9 shows the ECS values and the realized warming fraction (RWF) for the CMIP5 data  
607 and SCMs used to produce Figure 5. The RWF reveals that the SCMs used in this study  
608 generally warm faster than the more complex models in CMIP5.

609

611 **Table S9** CMIP5 and SCM model information with ECS and RWF

| Centre(s)                                                                                                                                                                  | Model name   | ESC<br>(°C) | RWF (%)<br>$LN(2) \times \frac{\text{Average of the last 40 years}}{ECS}$ |
|----------------------------------------------------------------------------------------------------------------------------------------------------------------------------|--------------|-------------|---------------------------------------------------------------------------|
| Beijing Climate Center (BCC)<br><b>China</b>                                                                                                                               | BCC-CSM1.1   | 2.8         | 83.4                                                                      |
| Canadian Centre for Climate<br>Modelling and Analysis<br>(CCCma)<br><b>Canada</b>                                                                                          | CanESM2      | 3.7         | 77.0                                                                      |
| Centre National de Recherches<br>Météorologiques,<br>Centre Européen de Recherche<br>et de Formation Avancée en<br>Calcul Scientifique (CNRM-<br>CERFACS)<br><b>France</b> | CNRM-CM5-2   | 3.3         | 69.7                                                                      |
| Institut Pierre Simon Laplace<br>(IPSL)<br><b>France</b>                                                                                                                   | IPSL-CM5A-LR | 4.1         | 69.8                                                                      |
|                                                                                                                                                                            | IPSL-CM5A-MR | NA          | NA                                                                        |
|                                                                                                                                                                            | IPSL-CM5B-LR | 3.6         | 72.9                                                                      |
| Institute of Atmospheric<br>Physics, Chinese Academy of<br>Sciences (LASG-CESS)<br><b>China</b>                                                                            | FGOALS-g2    | NA          | NA                                                                        |
| Atmosphere and Ocean<br>Research Institute (The<br>University of Tokyo),<br>National Institute for<br>Environmental Studies, and                                           | MIROC-ESM    | 4.7         | 65.1                                                                      |
|                                                                                                                                                                            | MIROC5       | 2.7         | 68.6                                                                      |

|                                                                                     |                      |      |      |
|-------------------------------------------------------------------------------------|----------------------|------|------|
| Japan Agency for Marine-<br>Earth Science and Technology<br>(MIROC)<br><b>Japan</b> |                      |      |      |
| Max Planck Institute for<br>Meteorology (MPI-M)<br><b>Germany</b>                   | MPI-ESM-MR           | NA   | NA   |
|                                                                                     | MPI-ESM-P            | 3.5  | 71.7 |
| NASA/GISS (Goddard<br>Institute for Space Studies;<br>NASA-GISS)<br><b>USA</b>      | GISS-E2-H            | 2.3  | 70.2 |
|                                                                                     | GISS-E2-R            | 2.1  | 62.3 |
| Geophysical Fluid Dynamics<br>Laboratory (NCAR; NSF-<br>DOE-NCAR)<br><b>USA</b>     | GFDL-CM3             | 4.0  | 70.5 |
|                                                                                     | GFDL-ESM2G           | 2.4  | 82.9 |
| Raper et al. 1996; Wigley and<br>Raper 2002; Smith and Bond<br>2014                 | MAGICC 5.3 BC-<br>OC | 3.0* | 82.0 |
| Meinshausen et al. 2011                                                             | MAGICC 6.0           | 3.0* | 83.8 |
| Hartin et al. 2015<br>Hartin et al. 2016                                            | Hector v2.0          | 3.0* | 90.3 |
| Millar et al. 2017                                                                  | FAIR                 | 2.75 | 86.2 |
| Myhre et al. 2013                                                                   | AR5-IR               | 2.7  | 66.8 |

612 \*Unless otherwise noted.

613 Note: NA denotes models that have not reported an ESC value from Table 9.5 in IPCC

614 AR5(Flato et al. 2013).

615

## **S10.1 Changing Equilibrium Climate Sensitivity Values in SCMs with Comparison to CMIP5**

Here we reproduce Figure 5 from the main paper using different ECS values in Hector v2.0, MAGCC 5.3, and MAGIC 6.0. We run each of these SCMs with a climate sensitivity values of 2.1°C, the same as GISS-E2-R, and 4.7°C, the same as MIROC-ESM. These two model values were selected because they represent the largest range of climate sensitivity values in the model data used here. Figure S22 shows the global mean temperature response from 4xCO<sub>2</sub> concentration step in CMIP5 models and SCMs. The SCMs were run with two different ECS values. Figure S22a shows the SCM response with an ECS value of 2.1°C and Figure S22b shows the SCM responses with an ECS value of 4.7°C.

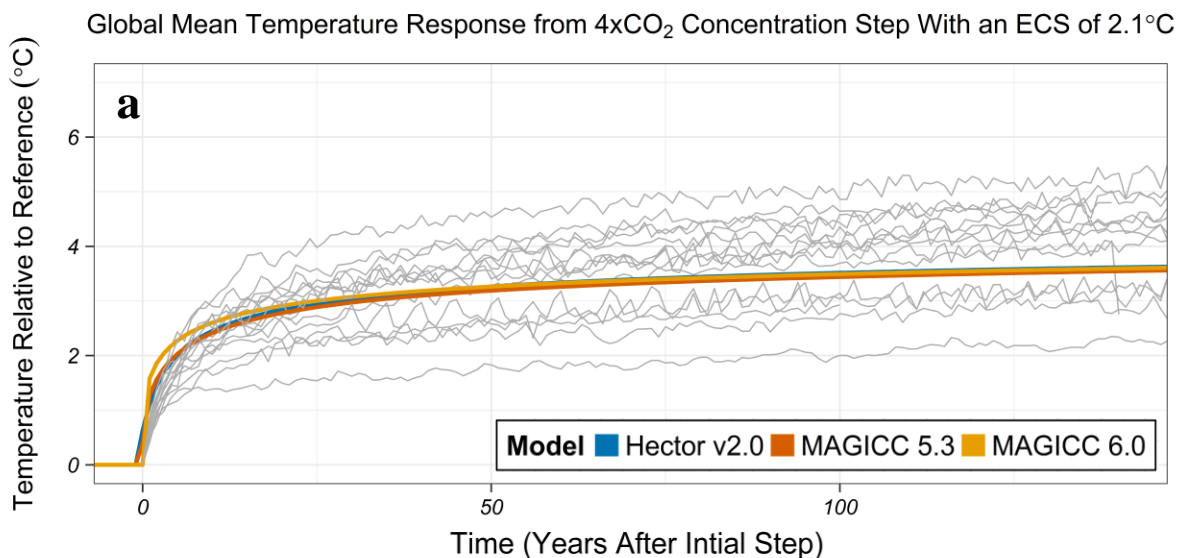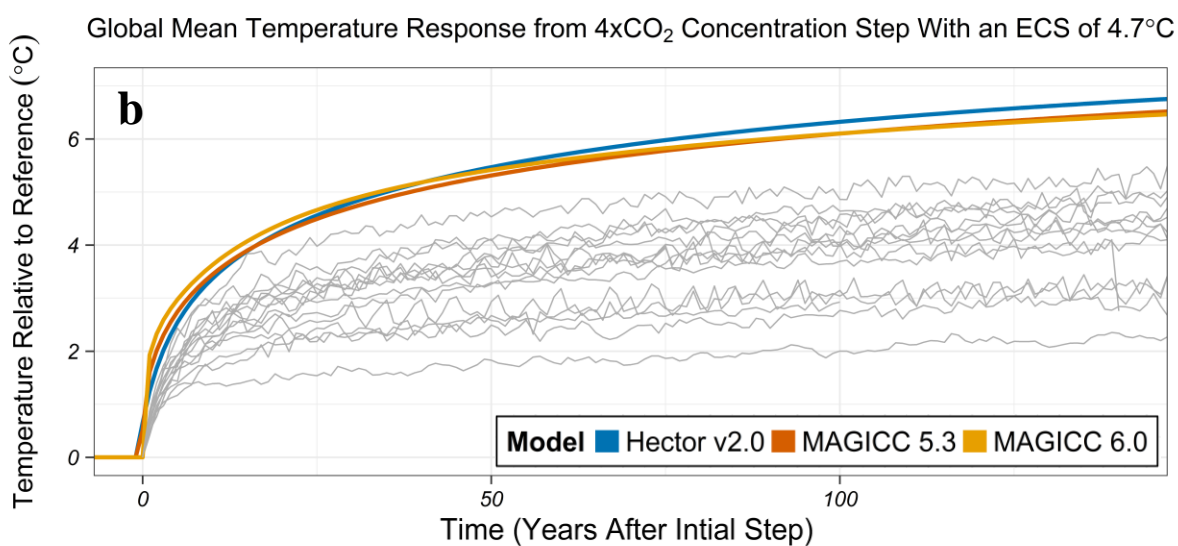

**Figure S22** Global mean temperature response from 4xCO<sub>2</sub> concentration step in CMIP5 models and SCMs, as in Fig. 5, with the SCMs run with two different ECS values. Fig. 22a shows the SCM response with an ECS value of 2.1°C, and Fig. 22b shows the SCM responses with an ECS value of 4.7°C (MAGICC 6.0 – yellow, MAGICC 5.3 BC-OC – red, Hector v2.0 – blue)

**S11 Comparison to Previous Impulse Responses Work by Joos *et al.* (Joos et al. 2013)**

We conducted the same perturbation experiment done by Joos et al. (Joos et al. 2013) with our three comprehensive SCMs and two stylized SCMs, however, we do not conduct this against a constant CO<sub>2</sub> concentration background. Instead, we use the RCP 4.5 scenario and add a 100GtC CO<sub>2</sub> pulse in 2015. It is useful to note that MAGICC 6.0 was used both in this study and by Joos *et al.* The versions used in each study differ slightly. Joos *et al.* used MAGICC model version 6.3 run in 171 different parameter settings that emulate 19 AOGCMs and 9 coupled climate-carbon cycle models. MAGICC 6.0 used in this study was set at the default setting using the AOGCM multi-model mean.

Table S10 shows the time-integrated airborne fraction at chosen time horizons from the 100 GtC pulse of CO<sub>2</sub> emissions. The Table S10 results are graphically represented in SI. Fig. 23. These results are largely discussed in the main paper.

651

652 **Table S10** Time-integrated Airborne Fraction from a 100 GtC CO<sub>2</sub> Emissions Impulse in SCMs  
 653 Compared to Results from Table 4 in Joos *et al.* (Joos et al. 2013)

| Time Horizon           | 20 yr            | 50 yr            | 100 yr           |
|------------------------|------------------|------------------|------------------|
| NCAR CSM1.4            | 13.8             | 27.8             | 46.6             |
| HadGEM2-ES             | 14.7             | 30.9             | 53.3             |
| MPI-ESM                | 14.5             | 29.2             | 48.8             |
| Bern3D-LPJ (reference) | 15.4             | 34.3             | 61.9             |
| Bern3D-LPJ ensemble    | 15.1 (14.0-16.0) | 32.7 (28.9-36.0) | 57.6 (48.9-65.6) |
| Bern2.5D-LPJ           | 13.9             | 29.7             | 51.1             |
| CLIMBER2-LPJ           | 13.0             | 26.8             | 49.2             |
| DCESS                  | 14.6             | 31.8             | 56.3             |
| GENIE ensemble         | 13.6 (10.9-17.6) | 28.9 (21.7-41.4) | 50.5 (38.3-77.9) |
| LOVECLIM               | 13.5             | 27.9             | 45.3             |
| MESMO                  | 15.1             | 33.6             | 61.1             |
| UVic2.9                | 13.7             | 29.5             | 53.0             |
| ACC2                   | 13.7             | 27.9             | 46.5             |
| Bern-SAR               | 14.0             | 29.0             | 48.9             |
| TOTEM2                 | 16.9             | 38.3             | 66.6             |
| MAGICC 6.0 ensemble    | 14.0 (12.0-16.1) | 29.6 (23.6-35.7) | 51.8 (40.0-64.2) |
| Multi-model mean       | 14.3 ± 1.8       | 30.2 ± 5.7       | 52.4 ± 11.3      |
|                        |                  |                  |                  |
| Hector v2.0            | 16.2             | 34.0             | 58.3             |
| MAGICC 5.3             | 16.0             | 33.4             | 58.3             |
| MAGICC 6.0             | 15.3             | 32.2             | 57.9             |
| AR5-IR                 | 15.0             | 31.0             | 53.1             |
| FAIR                   | 14.6             | 32.6             | 61.6             |



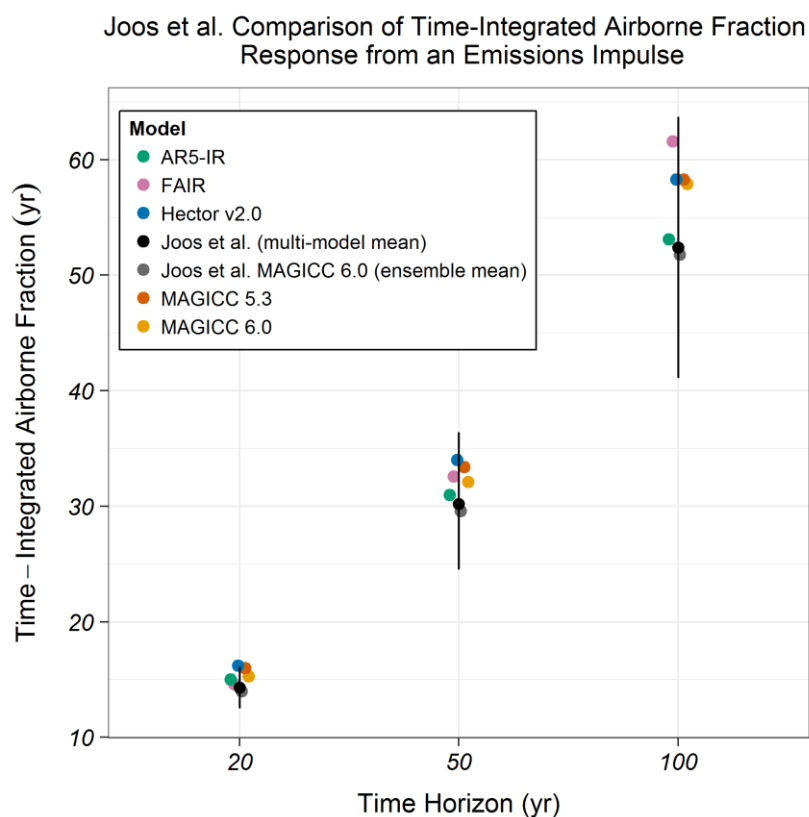

**Figure S23** Time-integrated airborne fraction from a 100GtC CO<sub>2</sub> emissions impulse in SCMs compared to Joos et al. This is not a direct comparison because we did not perform this experiment with a constant CO<sub>2</sub> concentration background, as done by Joos et al. The colored points represent the time-integrated airborne fraction in the SCMs used in this study, following Joos et al., and the Joos et al. MAGICC 6.0 ensemble mean. The black point is the Joos et al. multi-model mean and the vertical black line represents the range of the Joos et al. model results. (Joos et al. MAGICC 6.0 ensemble mean –grey, MAGICC 6.0 –yellow, MAGICC 5.3 BC-OC –red, Hector v2.0 –blue, AR5-IR –green, FAIR –pink).

656

657 We also indirectly compare the temperature response of the comprehensive SCMs and more  
658 complex models in Joos *et al.* MAGICC 6.0 was used both here and by Joos *et al.*, and we find  
659 similar responses with  $\leq 1$  °C yr difference from Joos *et al.* at each reported period. Though the  
660 other two comprehensive SCMs were not used by Joos *et al.*, their similar responses to our  
661 MAGICC 6.0 allow us to make a larger conclusion, as done in the main paper. Using this logic,  
662 we are able to validate our SCM responses from a finite pulse, without conducting this  
663 experiment in ESMs or EMICs, directly. We find that the comprehensive SCM responses are  
664 generally less varied, close to the Joos *et al.* ensemble mean 20 years after the pulse, and below  
665 most Joos *et al.* model responses 50 and 100 years after the pulse (see Figure S24).

666

667

668 **Table S11** Time-integrated temperature response from a 100 GtC CO<sub>2</sub> Emissions Impulse in  
 669 SCMs Compared to Results from Table 7 in Joos *et al.*

| Time Horizon           | 20 yr          | 50 yr           | 100 yr          |
|------------------------|----------------|-----------------|-----------------|
| NCAR CSM1.4            | 2.53           | 7.36            | 10.6            |
| HadGEM2-ES             | 4.24           | 12.4            | 30.3            |
| MPI-ESM                | 3.83           | 8.84            | 19.1            |
| Bern3D-LPJ (reference) | 4.11           | 12.1            | 24.5            |
| Bern3D-LPJ ensemble    | 3.20 (2.1-4.6) | 8.61 (5.1-13.5) | 17.3 (9.5-29.3) |
| Bern2.5D-LPJ           | 3.15           | 8.40            | 17.1            |
| CLIMBER2-LPJ           | 3.05           | 7.96            | 16.5            |
| DCESS                  | 3.38           | 9.96            | 20.6            |
| GENIE ensemble         | 3.77           | 10.54           | 21.6            |
| LOVECLIM               | 0.22           | 3.46            | 7.83            |
| MESMO                  | 4.41           | 12.5            | 26.0            |
| UVic2.9                | 3.40           | 9.17            | 18.5            |
| ACC2                   | 3.99           | 10.55           | 20.0            |
| Bern-SAR               | n/a            | n/a             | n/a             |
| TOTEM2                 | n/a            | n/a             | n/a             |
| MAGICC 6.0 ensemble    | 3.64 (2.7-4.7) | 8.96 (6.6-12.7) | 17.2 (12-26)    |
| Multi-model mean       | 3.29 ± 2.03    | 9.13 ± 4.45     | 18.7 ± 11.1     |
|                        |                |                 |                 |
| Hector v2.0            | 3.05           | 8.20            | 15.54           |
| MAGICC 5.3             | 3.13           | 8.19            | 15.73           |
| MAGICC 6.0             | 3.39           | 8.28            | 15.54           |

670

# Joos et al. Comparison of Time-Integrated Temperature Response from an Emissions Impulse

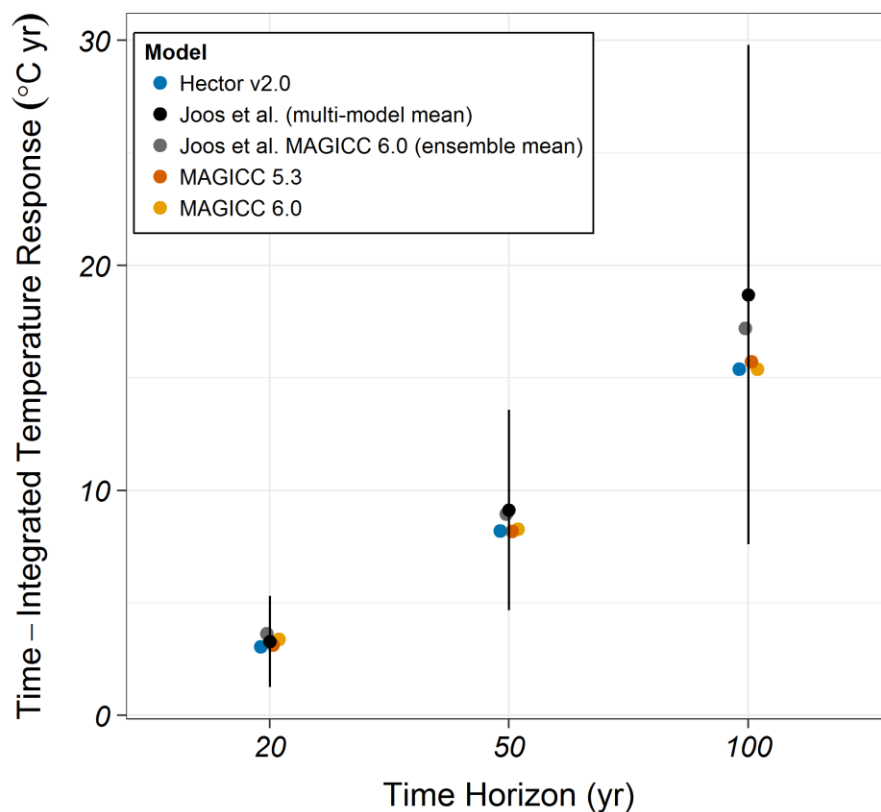

**Figure S24** Time-integrated temperature response from a 100GtC CO<sub>2</sub> emissions impulse in SCMs compared to Joos et al. This is not a direct comparison because we did not perform this experiment with a constant CO<sub>2</sub> concentration background, as done by Joos et al. The colored points represent the time-integrated temperature response in the SCMs used in this study, following Joos et al., and the Joos et al. MAGICC 6.0 ensemble mean. The black point is the Joos et al. multi-model mean and the vertical black line represents the range of the Joos et al. model results. (Joos et al. MAGICC 6.0 ensemble mean –grey, MAGICC 6.0 – yellow, MAGICC 5.3 BC-OC – red, Hector v2.0 – blue).

680

681 We compare the comprehensive SCM responses from the 100GtC CO<sub>2</sub> pulse to our earlier  
682 experiment using a ~10GtC CO<sub>2</sub> pulse. We find that the relative behavior of the comprehensive  
683 SCMs in the 100 GtC CO<sub>2</sub> impulse is similar to the response pattern from the smaller pulse  
684 experiment (see Figure 3a and Figure S25). The MAGICC 6.0 temperature response pattern is  
685 consistent with our prior experiments, where we see an initially stronger response (10 years  
686 following the perturbation) compared to the other comprehensive SCMs. Due to the initial  
687 oscillatory behavior in complex model responses (see Figure 2a in Joos *et al.*(Joos et al. 2013)),  
688 it is difficult to compare SCM responses to complex models on these short time scale.

689

690

691

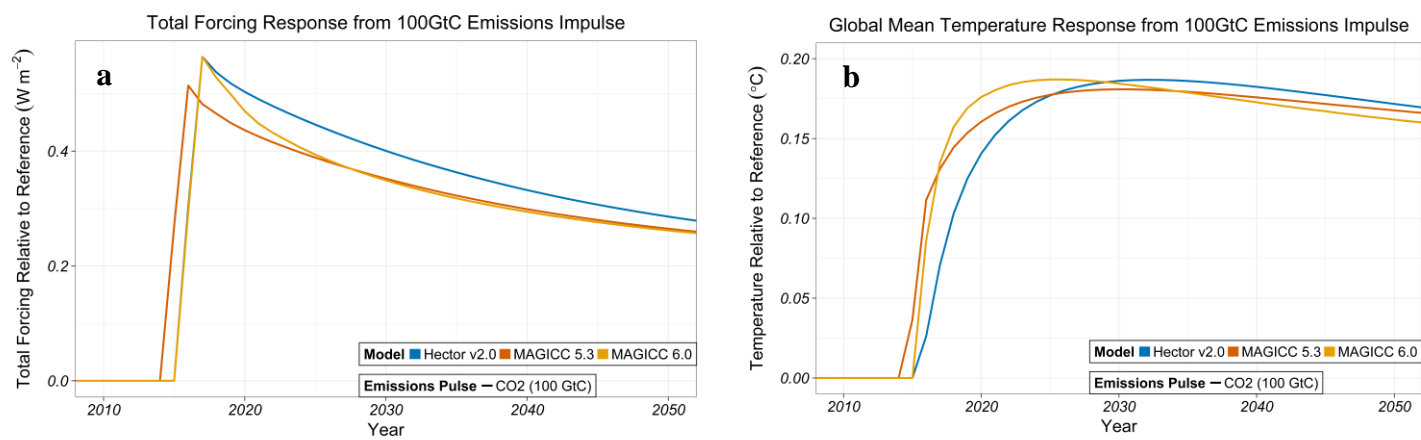

**Figure S25** Total forcing response (a) and global mean temperature response (b) from a 100GtC CO<sub>2</sub> emissions impulse in the SCMs (MAGICC 6.0 – yellow, MAGICC 5.3 BC-OC – red, Hector v2.0 – blue).

692

693

694

695

## 696 **S12 Investigating Temperature Response from BC Step Experiment**

697

698 We investigate SCM responses to a black carbon (BC) emissions step by quadrupling (4x) the  
699 values in 2015. We choose two of the SCMs, Hector v2.0 and MAGICC 5.3, as examples and  
700 compare the temperature response to Figure 1 in Sand *et al* (Sand et al. 2016). Sand *et al.* finds  
701 that after applying a 25x BC emissions step to NorESM1-M, a complex climate model, the  
702 temperature response levels off after it reaches 1.2K after less than 10 years. Sand *et al.* applies a  
703 large BC step to increase the signal in the complex model, while we apply a smaller step in the  
704 SCMs. We find that the SCM responses to a BC emissions step continue to increase 10 years  
705 after the perturbation, suggesting that the SCMs fail to capture aerosol dynamics.

706

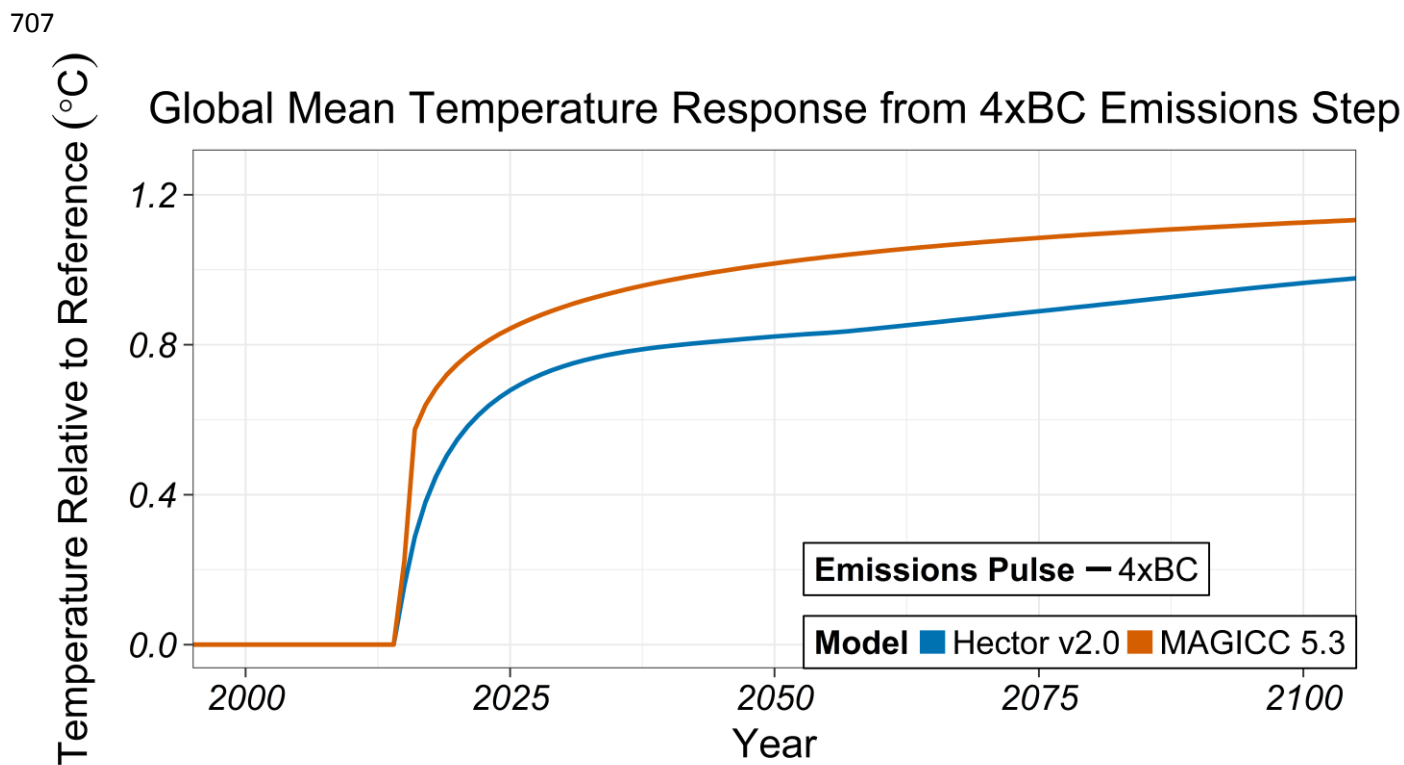

**Figure S26** Global mean temperature response from a 4xBC emissions step in the SCMs (MAGICC 5.3 BC-OC – red, Hector v2.0 – blue).

708



### S13 Summary of SCM Performance in Table 1

We provide a summary of SCM performance for each of our recommended unit tests in Table 1 in the main paper. Here, we describe the performance scale used in Table 1.

Using results from Joos *et al.* (Joos et al. 2013), we found that the MAGICC 6.0 temperature response to a 100GtC CO<sub>2</sub> emissions impulse was similar to more complex models. In the main text, therefore, we use MAGICC 6.0 as a reference to understand the other comprehensive SCM responses. We report that the comprehensive SCM carbon cycle representations, including from MAGICC 5.3 and Hector v2.0, generally capture more complex model responses. For unit tests where we cannot directly compare the responses to complex model, therefore, we use the comprehensive SCM average.

We developed the performance scale in Table 1 generally using the time-integrated temperature response percent difference from the comprehensive SCM average. We set the scale based on the range in percent differences found in our analysis: • : 0-10% difference, •• : 10-20% difference, and ••• : 20-30% difference from the comprehensive SCM average (see S9).

For example, we assign the comprehensive SCM responses to a CO<sub>2</sub> concentration impulse a three (•••) because the responses are within 10% of the comprehensive SCM average. The idealized SCMs, FAIR v1.0 and AR5-IR, have greater differences and are given a two (••) and a one (•), respectively.

Under the 4xCO<sub>2</sub> concentration step experiment, we can compare the SCM response to more complex models from CMIP5. We assign MAGICC 6.0 a three (•••) because it appears to respond more reasonably under stronger forcing conditions than the other SCMs. We assign Hector v2.0, MAGICC 5.3, and FAIR a two (••) because these SCMs have initially quicker responses to an abrupt 4xCO<sub>2</sub> concentration increase compared to the ESMs. We assign AR5-IR a one (•) because it has a slower response to an abrupt 4xCO<sub>2</sub> concentration increase and is insensitive to changing background concentrations.

For CH<sub>4</sub> emissions impulses, we use the difference from the comprehensive SCM average to rate the responses. Unlike the 100GtC CO<sub>2</sub> and 4xCO<sub>2</sub> step experiments, we cannot compare the SCM responses to more complex models, therefore, we are more lenient in our performance assignment against the comprehensive SCM average. CH<sub>4</sub> is a well-mixed GHG and, therefore, we expect that the climate system response to CH<sub>4</sub> concentration perturbations will be similar to that for CO<sub>2</sub>. However, it would be useful to evaluate in more complex models if the simple representation of chemistry in the comprehensive SCMs adequately represents the time evolution of CH<sub>4</sub> concentrations in response to a change in emissions.

Finally, we assign ratings to the SCM responses to aerosols. We do not explicitly conduct aerosol experiments other than BC because the responses of the SCMs to other aerosols will be similar to their response to BC. We do not have a definitive reference for the time-dependent response to aerosol forcing perturbations. Instead, we rate the SCMs using the difference from the average of both MAGICC models, which both differentiate aerosol forcing between land and ocean, which results in a faster overall climate response to aerosols as compared to greenhouse gases (Shindell 2014). In the case of BC, we note that all SCM response ratings should be reduced from the values shown because they do not accurately represent the temporal response to a BC step found in an ESM (see S12). A more definitive evaluation of climate system responses to aerosol perturbations would be useful. This would require additional GCM simulations to step emission changes for various aerosol species and/or forcing mechanisms.

## **S14 Supplementary Data**

**Other supplementary materials for this manuscript include the following:**

### **Dataset S1 (separate file)**

Simple climate model responses from 4xBC emissions step.

770   **Dataset S2 (separate file)**  
771   Simple climate model responses from 4xCO<sub>2</sub> concentration step with 2.3 ocean diffusion and an  
772   ECS = 3 °C.

773   **Dataset S3 (separate file)**  
774   Simple climate model responses from a 100PgC CO<sub>2</sub> emissions impulse experiment.  
775

776   **Dataset S4 (separate file)**  
777   Simple climate model responses from a CH<sub>4</sub> emissions impulse experiment.  
778

779   **Dataset S5 (separate file)**  
780   Simple climate model responses from a BC emissions impulse experiment.  
781

782   **Dataset S6 (separate file)**  
783   Simple climate model responses from CO<sub>2</sub> concentration impulse experiment.  
784

785   **Dataset S7 (separate file)**  
786   Simple climate model responses from CO<sub>2</sub> emissions impulse experiment.  
787

788   **Dataset S8 (separate file)**  
789   AR5-IR code to produce responses to BC emissions impulse.  
790

791   **Dataset S9 (separate file)**  
792   AR5-IR code to produce responses to CH<sub>4</sub> emissions impulse.  
793

794   **Dataset S10 (separate file)**  
795   AR5-IR code to produce responses to CO<sub>2</sub> emissions impulse.  
796

797   **Dataset S11 (separate file)**

798 AR5-IR code to produce responses to 100PgC CO<sub>2</sub> emissions impulse for comparison to Joos *et*  
799 *al.*  
800  
801 **Dataset S12 (separate file)**  
802 AR5-IR code to produce responses to CO<sub>2</sub> concentration step.  
803  
804 **Dataset S13 (separate file)**  
805 FAIR CO<sub>2</sub> concentration impulse experiment input file.  
806  
807 **Dataset S14 (separate file)**  
808 FAIR 4xCO<sub>2</sub> concentration step experiment input file.  
809  
810 **Dataset S15 (separate file)**  
811 FAIR CO<sub>2</sub> emissions impulse experiment input file.  
812  
813 **Dataset S16 (separate file)**  
814 FAIR 100Pg CO<sub>2</sub> emissions impulse experiment input file.  
815  
816 **Dataset S17 (separate file)**  
817 FAIR CO<sub>2</sub> emissions impulse experiment reference input file.  
818  
819 **Dataset S18 (separate file)**  
820 Hector v2.0 CO<sub>2</sub> concentration impulse experiment input file.  
821  
822 **Dataset S19 (separate file)**  
823 Hector v2.0 CO<sub>2</sub> concentration impulse experiment reference input file.  
824  
825 **Dataset S20 (separate file)**  
826 Hector v2.0 4xCO<sub>2</sub> concentration step experiment reference input file.

827

828   **Dataset S21 (separate file)**

829   Hector v2.0 4xCO<sub>2</sub> concentration step experiment input file.

830   **Dataset S22 (separate file)**

831   Hector v2.0 BC emissions impulse experiment input file.

832

833   **Dataset S23 (separate file)**

834   Hector v2.0 BC emissions step experiment input file.

835

836   **Dataset S24 (separate file)**

837   Hector v2.0 CH<sub>4</sub> emissions impulse experiment input file.

838

839   **Dataset S25 (separate file)**

840   Hector v2.0 CO<sub>2</sub> emissions impulse experiment input file.

841

842   **Dataset S26 (separate file)**

843   Hector v2.0 100Pg CO<sub>2</sub> emissions impulse experiment input file.

844

845   **Dataset S27 (separate file)**

846   Hector v2.0 emissions impulse experiment reference input file.

847

848   **Dataset S28 (separate file)**

849   Hector v2.0 emissions step experiment reference input file.

850

851   **Dataset S29 (separate file)**

852   MAGICC5.3 CO<sub>2</sub> concentration impulse experiment reference input file.

853

854   **Dataset S30 (separate file)**

855   MAGICC5.3 CO<sub>2</sub> concentration impulse experiment input file.  
856  
857   **Dataset S31 (separate file)**  
858   MAGICC5.3 4xCO<sub>2</sub> concentration step experiment input file.  
859  
860   **Dataset S32 (separate file)**  
861   MAGICC5.3 4xCO<sub>2</sub> concentration step experiment reference input file.  
862  
863   **Dataset S33 (separate file)**  
864   MAGICC5.3 BC emissions impulse experiment input file.  
865  
866   **Dataset S34 (separate file)**  
867   MAGICC5.3 BC emissions step experiment input file.  
868  
869   **Dataset S35 (separate file)**  
870   MAGICC5.3 CH<sub>4</sub> emissions impulse experiment input file.  
871  
872   **Dataset S36 (separate file)**  
873   MAGICC5.3 1% CO<sub>2</sub> emissions impulse experiment in 2010 input file.  
874  
875   **Dataset S37 (separate file)**  
876   MAGICC5.3 1.01% CO<sub>2</sub> emissions impulse experiment in 2010 input file.  
877  
878   **Dataset S38 (separate file)**  
879   MAGICC5.3 5% CO<sub>2</sub> emissions impulse experiment in 2010 input file.  
880  
881   **Dataset S39 (separate file)**  
882   MAGICC5.3 10% CO<sub>2</sub> emissions impulse experiment in 2010 input file.

883

884 **Dataset S40 (separate file)**

885 MAGICC5.3 50% CO<sub>2</sub> emissions impulse experiment in 2010 input file.

886 **Dataset S41 (separate file)**

887 MAGICC5.3 100% CO<sub>2</sub> emissions impulse experiment in 2010 input file.

888

889 **Dataset S42 (separate file)**

890 MAGICC5.3 100% CO<sub>2</sub> emissions impulse experiment in 2015 input file.

891

892 **Dataset S43 (separate file)**

893 MAGICC5.3 100% CO<sub>2</sub> emissions impulse experiment in 2020 input file.

894

895 **Dataset S44 (separate file)**

896 MAGICC5.3 100% CO<sub>2</sub> emissions impulse experiment in 2030 input file.

897

898 **Dataset S45 (separate file)**

899 MAGICC5.3 100% CO<sub>2</sub> emissions impulse experiment in 2040 input file.

900

901 **Dataset S46 (separate file)**

902 MAGICC5.3 100% CO<sub>2</sub> emissions impulse experiment in 2050 input file.

903

904 **Dataset S47 (separate file)**

905 MAGICC5.3 100% CO<sub>2</sub> emissions impulse experiment in 2060 input file.

906

907 **Dataset S48 (separate file)**

908 MAGICC5.3 100% CO<sub>2</sub> emissions impulse experiment in 2070 input file.

909

910 **Dataset S49 (separate file)**

911 MAGICC5.3 100PgC CO<sub>2</sub> emissions impulse experiment in 2015 input file.

912

913 **Dataset S50 (separate file)**

914 MAGICC5.3 CO<sub>2</sub> emissions impulse experiment reference input file.

915

916 **Dataset S51 (separate file)**

917 MAGICC5.3 CO<sub>2</sub> emissions step experiment reference input file.

918

919 **Dataset S52 (separate file)**

920 MAGICC56.0 4xCO<sub>2</sub> concentration impulse experiment input file.

921

922 **Dataset S53 (separate file)**

923 MAGICC56.0 4xCO<sub>2</sub> concentration impulse experiment reference input file.

924

925 **Dataset S54 (separate file)**

926 MAGICC56.0 4xCO<sub>2</sub> concentration step experiment input file.

927

928 **Dataset S55 (separate file)**

929 MAGICC56.0 4xCO<sub>2</sub> concentration step experiment reference input file.

930

931 **Dataset S56 (separate file)**

932 MAGICC6.0 BC emissions impulse experiment input file.

933

934 **Dataset S57 (separate file)**

935 MAGICC6.0 CH<sub>4</sub> emissions impulse experiment input file.

936

937 **Dataset S58 (separate file)**

938 MAGICC6.0 100% CO<sub>2</sub> emissions impulse experiment input file.



939

940    **Dataset S59 (separate file)**

941    MAGICC6.0 100PgC CO<sub>2</sub> emissions impulse experiment input file.

942    **Dataset S60 (separate file)**

943    MAGICC6.0 emissions impulse experiment reference input file.

## S15 References

- Bakker, Alexander M. R., Tony E. Wong, Kelsey L. Ruckert, and Klaus Keller. 2017. "Sea-Level Projections Representing the Deeply Uncertain Contribution of the West Antarctic Ice Sheet." *Scientific Reports* 7(1): 3880. <http://www.nature.com/articles/s41598-017-04134-5> (November 27, 2017).
- Bond, T. C. et al. 2013. "Bounding the Role of Black Carbon in the Climate System: A Scientific Assessment." *Journal of Geophysical Research Atmospheres* 118(11): 5380–5552.
- Cicerone, R.J.; Oremland, R.S. 1988. "GLOBAL BIOGEOCHEMICAL Methane ( CH<sub>4</sub> ) Is the Most Abundant Organic Gas in Measurement Data Has Been Reviewed by Ehhalt [ 1974 ] and Wofsy [ 1976 ] and Will Not Be Repeated Here . Since the Earth ' s Energy Balance ( See The Quasi-Steady State ( Defined In." 2(4): 299–327.
- Clune, Thomas L, and R. B. Rood. 2011. "Software Testing and Verification in Climate Model Development." *IEEE Software* 28(6): 49–55. <http://ieeexplore.ieee.org/lpdocs/epic03/wrapper.htm?arnumber=5999647>.
- Flato, Gregory et al. 2013. "Evaluation of Climate Models." *Climate Change 2013: The Physical Science Basis. Contribution of Working Group I to the Fifth Assessment Report of the Intergovernmental Panel on Climate Change*: 741–866. [http://elib.dlr.de/95697/1/Alet-Eyring-WG1AR5\\_Chapter09\\_FINAL.pdf](http://elib.dlr.de/95697/1/Alet-Eyring-WG1AR5_Chapter09_FINAL.pdf) (October 17, 2017).
- Garner, Gregory, Patrick Reed, and Klaus Keller. 2016. "Climate Risk Management Requires Explicit Representation of Societal Trade-Offs." *Climatic Change* 134(4): 713–23. <http://link.springer.com/10.1007/s10584-016-1607-3> (November 27, 2017).
- Gupta, Alexander Sen, Nicolas C. Jourdain, Jaclyn N. Brown, and Didier Monselesan. 2013. "Climate Drift in the CMIP5 Models." *Journal of Climate* 26(21): 8597–8615.
- Harmesen, Mathijs J H M et al. 2015. "How Well Do Integrated Assessment Models Represent Non-CO<sub>2</sub> Radiative Forcing?" *Climatic Change* 133: 565–82. <https://link.springer.com/content/pdf/10.1007%2Fs10584-015-1485-0.pdf> (December 19, 2017).
- Hartin, C. A. et al. 2015. "A Simple Object-Oriented and Open-Source Model for Scientific and Policy Analyses of the Global Climate System - Hector v1.0." *Geoscientific Model Development* 8(4): 939–55.
- Hartin, Corinne A, Benjamin Bond-Lamberty, Pralit Patel, and Anupriya Mundra. 2016. "Ocean Acidification over the next Three Centuries Using a Simple Global Climate Carbon-Cycle Model: Projections and Sensitivities." *Biogeosciences* 13: 4329–42. [www.biogeosciences.net/13/4329/2016/](http://www.biogeosciences.net/13/4329/2016/) (October 17, 2017).
- Joos, F. et al. 2013. "Carbon Dioxide and Climate Impulse Response Functions for the Computation of Greenhouse Gas Metrics: A Multi-Model Analysis." *Atmospheric Chemistry and Physics* 13(5): 2793–2825.

- 983 Kriegler, Elmar. 2005a. "Imprecise Probability Analysis for Integrated Assessment of Climate  
984 Change." *Time*: 258. [https://publishup.uni-potsdam.de/opus4-](https://publishup.uni-potsdam.de/opus4-ubp/frontdoor/index/index/docId/497)  
985 [ubp/frontdoor/index/index/docId/497](https://publishup.uni-potsdam.de/opus4-ubp/frontdoor/index/index/docId/497) (October 29, 2017).
- 986 ———. 2005b. "Imprecise Probability Analysis for Integrated Assessment of Climate Change."  
987 *Time*: 258. <https://www.pik-potsdam.de/members/edenh/theses/PhDKriegler.pdf>  
988 (November 27, 2017).
- 989 Meinshausen, M., S. C B Raper, and T. M L Wigley. 2011. "Emulating Coupled Atmosphere-  
990 Ocean and Carbon Cycle Models with a Simpler Model, MAGICC6 - Part 1: Model  
991 Description and Calibration." *Atmospheric Chemistry and Physics* 11(4): 1417–56.
- 992 Millar, J. Richard, Zebedee R. Nicholls, Pierre Friedlingstein, and Myles R. Allen. 2017. "A  
993 Modified Impulse-Response Representation of the Global near-Surface Air Temperature  
994 and Atmospheric Concentration Response to Carbon Dioxide Emissions." *Atmospheric  
995 Chemistry and Physics* 17(11): 7213–28.
- 996 Myhre, Gunnar et al. 2013. "Anthropogenic and Natural Radiative Forcing." *Climate Change  
997 2013: The Physical Science Basis. Contribution of Working Group I to the Fifth Assessment  
998 Report of the Intergovernmental Panel on Climate Change*: 659–740.
- 999 Raper, S C B, and U Cubasch. 1996. "Emulation of the Results from a Coupled General  
1000 Circulation Model Using a Simple Climate Model." *Geophysical Research Letters* 23(10):  
1001 1107–10.
- 1002 Sand, M. et al. 2016. "Response of Arctic Temperature to Changes in Emissions of Short-Lived  
1003 Climate Forcers." *Nature Climate Change* 6(3): 286–89.
- 1004 Shindell, Drew T. 2014. "Inhomogeneous Forcing and Transient Climate Sensitivity." *Nature  
1005 Climate Change* 4(4): 18–21.
- 1006 Smith, Christopher J et al. "FAIR v1.1: A Simple Emissions-Based Impulse Response and  
1007 Carbon Cycle Model." [https://www.geosci-model-dev-discuss.net/gmd-2017-266/gmd-](https://www.geosci-model-dev-discuss.net/gmd-2017-266/gmd-2017-266.pdf?)  
1008 [2017-266.pdf?](https://www.geosci-model-dev-discuss.net/gmd-2017-266/gmd-2017-266.pdf?) (December 19, 2017).
- 1009 Smith, S J, and T C Bond. 2014. "Two Hundred Fifty Years of Aerosols and Climate: The End  
1010 of the Age of Aerosols." *Atmospheric Chemistry and Physics* 14(2): 537–49. [www.atmos-](http://www.atmos-chem-phys.net/14/537/2014/)  
1011 [chem-phys.net/14/537/2014/](http://www.atmos-chem-phys.net/14/537/2014/) (October 12, 2017).
- 1012 Taylor, Karl E., Ronald J. Stouffer, and Gerald A. Meehl. 2012. "An Overview of CMIP5 and  
1013 the Experiment Design." *Bulletin of the American Meteorological Society* 93(4): 485–98.
- 1014 Thomson, Allison M. et al. 2011. "RCP4.5: A Pathway for Stabilization of Radiative Forcing by  
1015 2100." *Climatic Change* 109(1): 77–94. [http://link.springer.com/10.1007/s10584-011-0151-](http://link.springer.com/10.1007/s10584-011-0151-4)  
1016 [4](http://link.springer.com/10.1007/s10584-011-0151-4) (October 12, 2017).
- 1017 Urban, Nathan M. et al. 2014. "Historical and Future Learning about Climate Sensitivity."  
1018 *Geophysical Research Letters* 41(7): 2543–52.  
1019 <http://doi.wiley.com/10.1002/2014GL059484> (November 27, 2017).
- 1020 van Vuuren, Detlef P. et al. 2011. "How Well Do Integrated Assessment Models Simulate  
1021 Climate Change?" *Climatic Change* 104(2): 255–85.

1022 Wigley, T. M. L., and S. C. B. Raper. 1992. "Implications for Climate and Sea Level of Revised  
1023 IPCC Emissions Scenarios." *Nature* 357(6376): 293–300.  
1024 <http://www.nature.com/articles/357293a0> (October 12, 2017).

1025

1026
